# Supplementary material
Source: PubMed Central journal article supplement (PMC5024635)

Supporting Information Datasets for “European  
Neolithic Societies Showed Early Warning  
Signals of Population Collapse”

Sean S. Downey, W. Randall Haas Jr., and Stephen Shennan

8 June, 2016

**EWS analysis for all regions.**

### A. Southern Germany beginning of increase to collapse

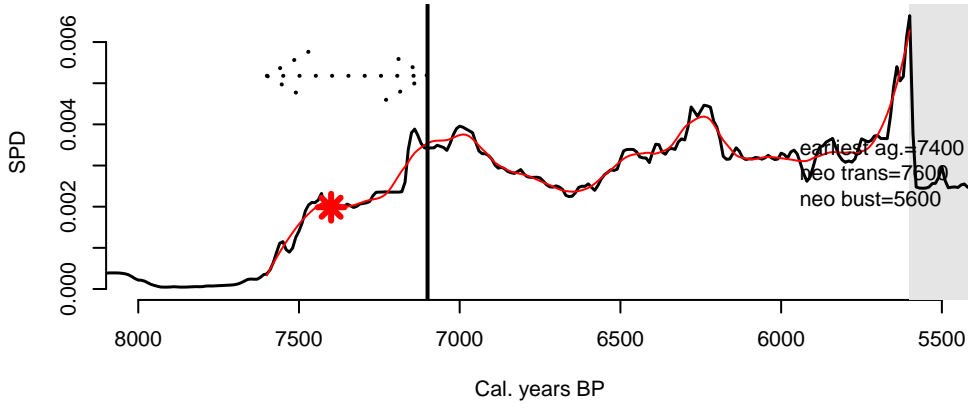

### B. Complete time series

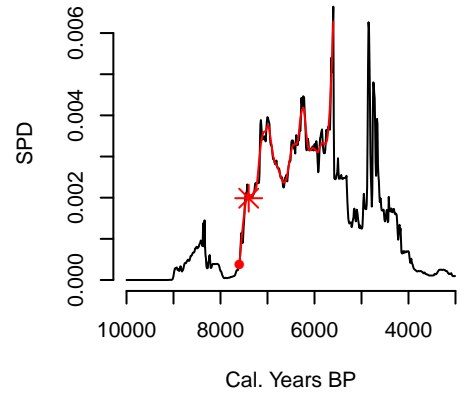

### C. AR[1]

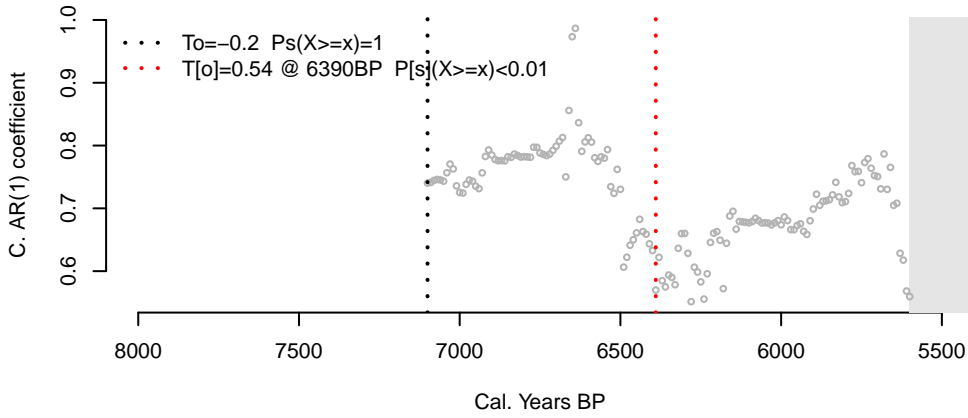

### D. AR[1]{Te}

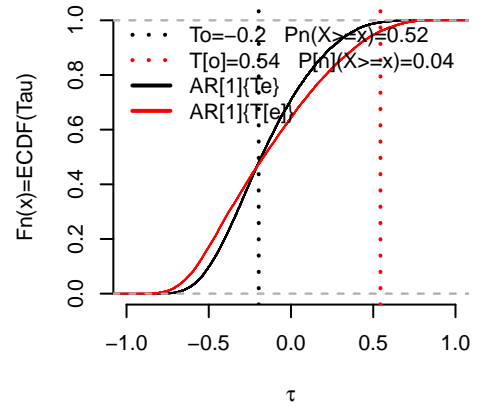

### E. Standard Deviation

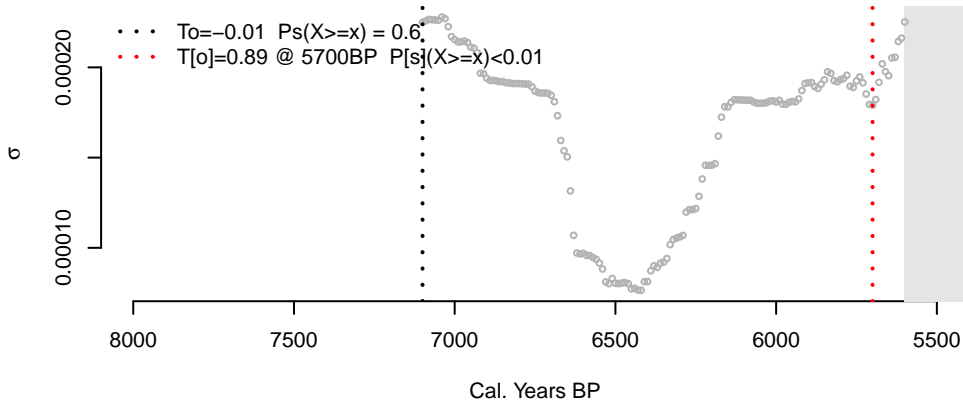

### F. SD{Te}

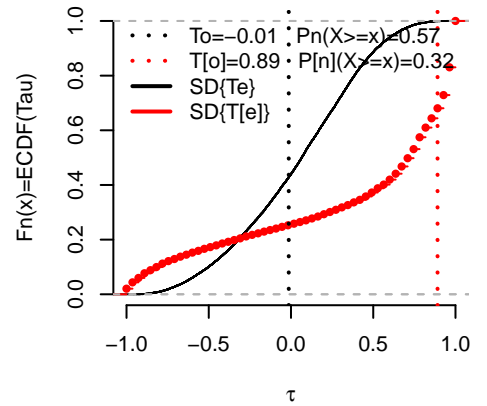

### G. Skewness

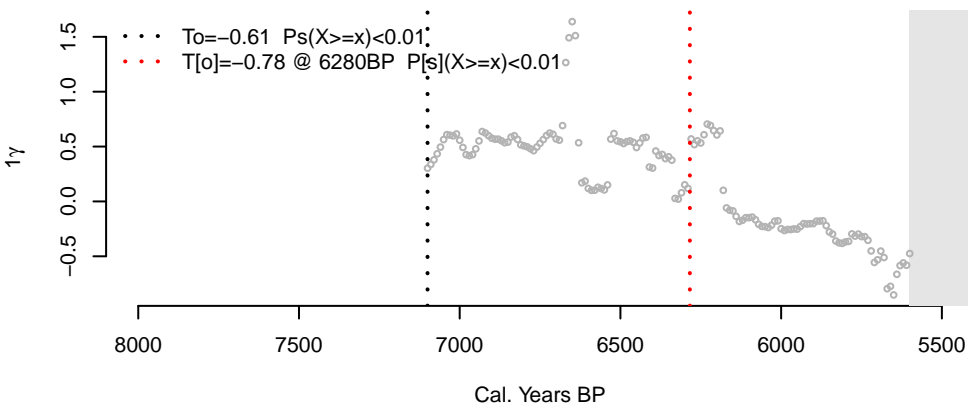

### H. SK{Tau sim}

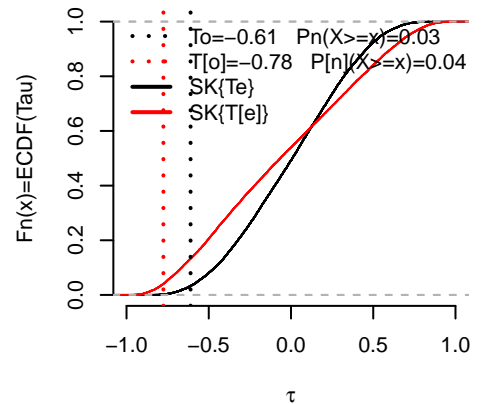

**A. Eastern Switzerland beginning of increase to collapse**

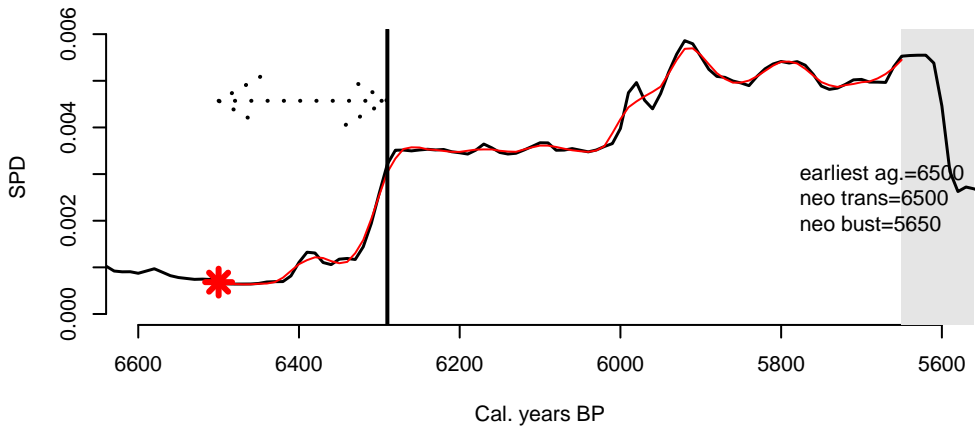

**B. Complete time series**

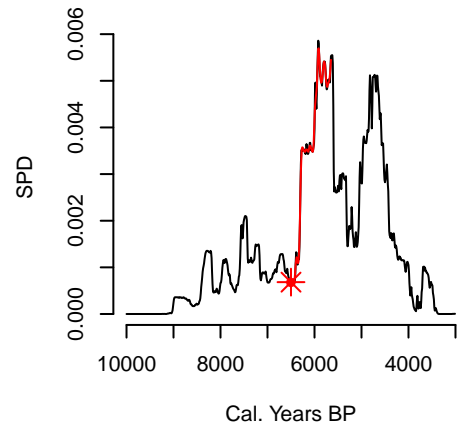

**C. AR[1]**

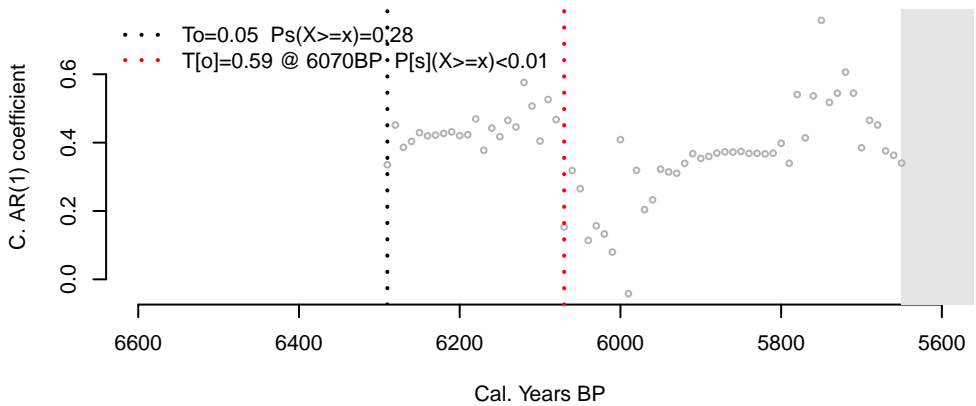

**D. AR[1]{Te}**

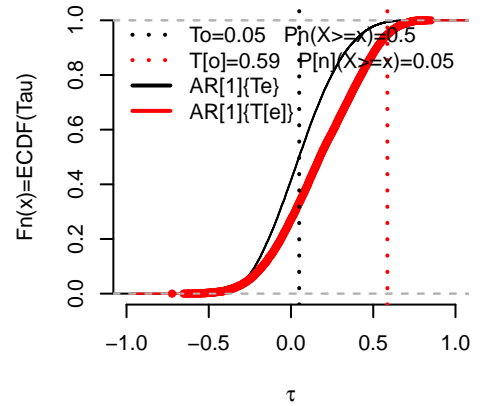

**E. Standard Deviation**

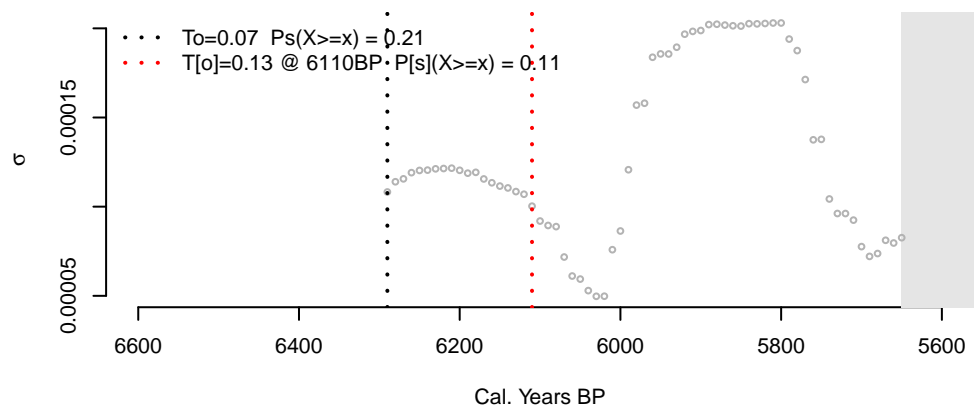

**F. SD{Te}**

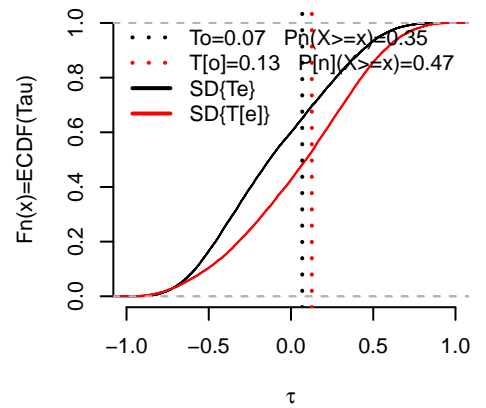

**G. Skewness**

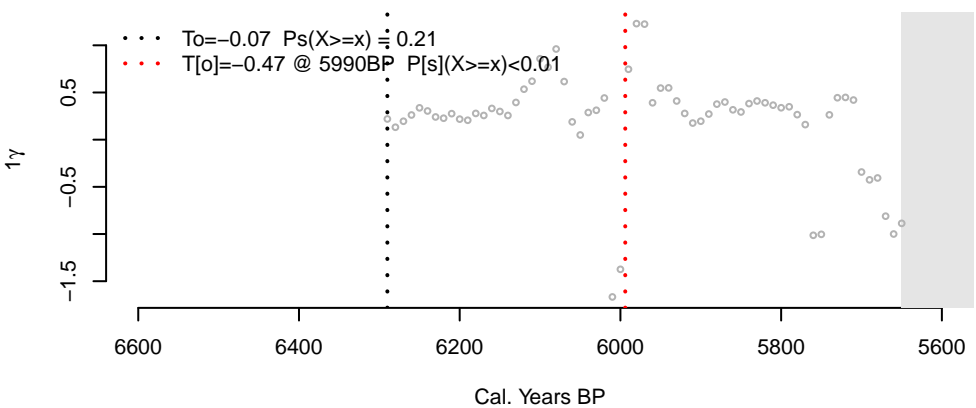

**H. SK{Tau sim}**

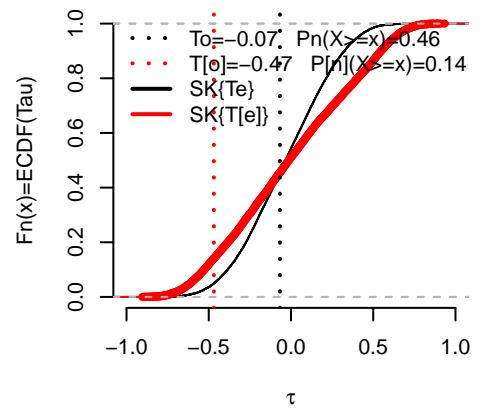

### A. England and Wales (w/o Wessex & Sussex) beginning of increase to collaps

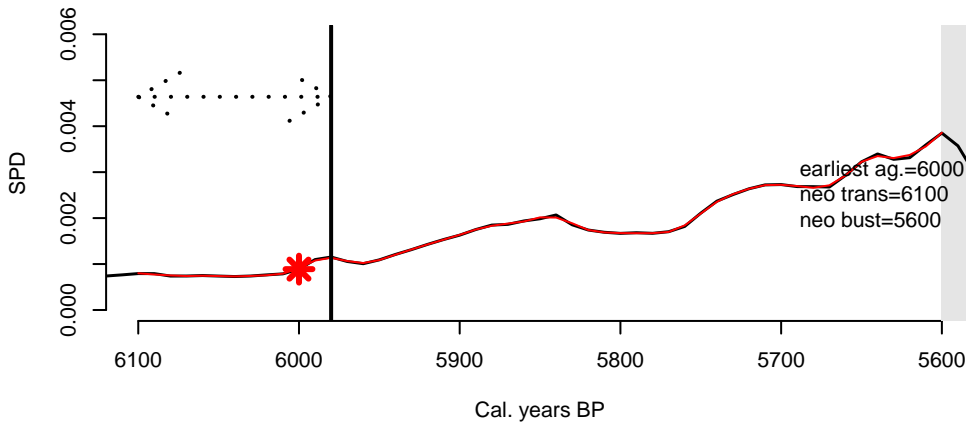

### B. Complete time series

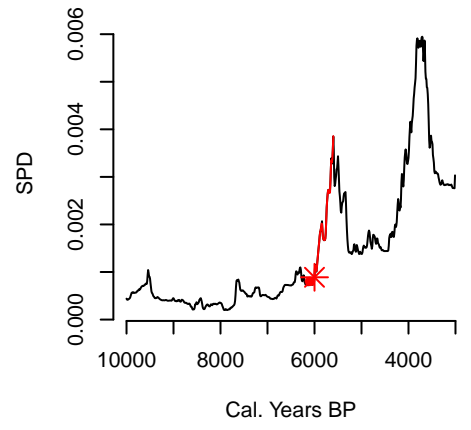

### C. AR[1]

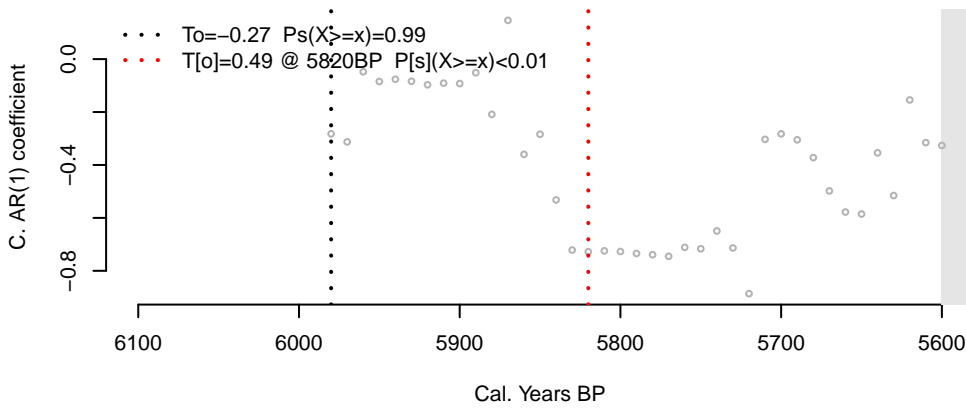

### D. AR[1]{Te}

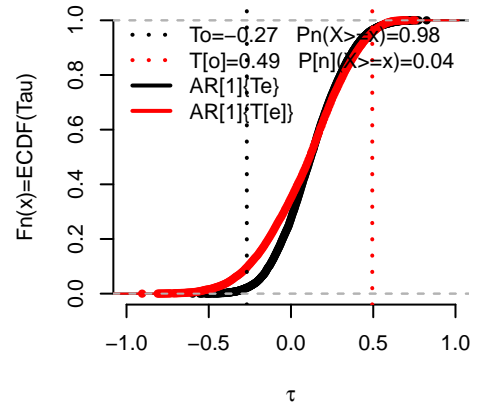

### E. Standard Deviation

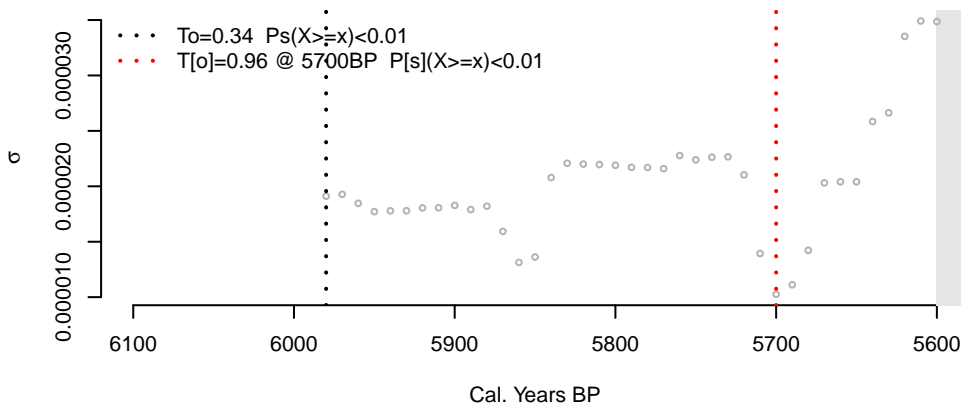

### F. SD{Te}

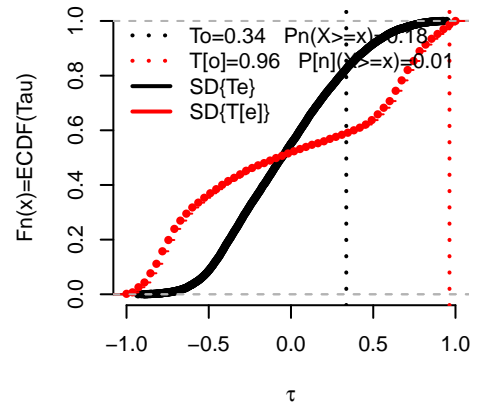

### G. Skewness

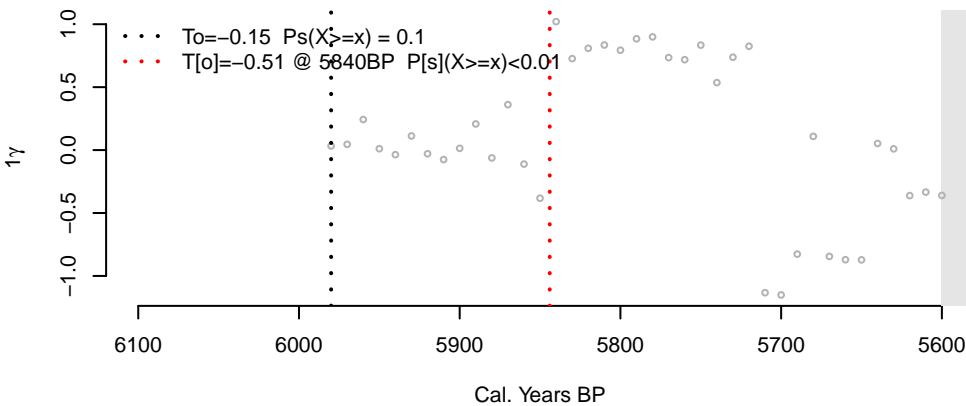

### H. SK{Tau sim}

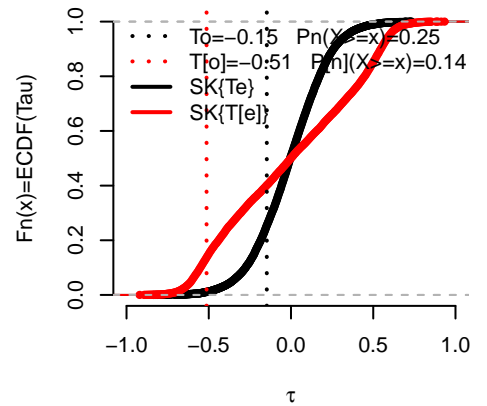

### A. Ireland beginning of increase to collapse

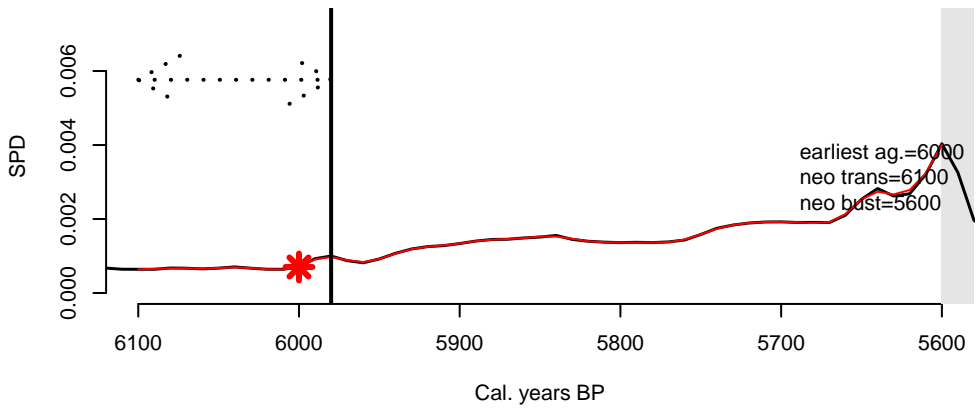

### B. Complete time series

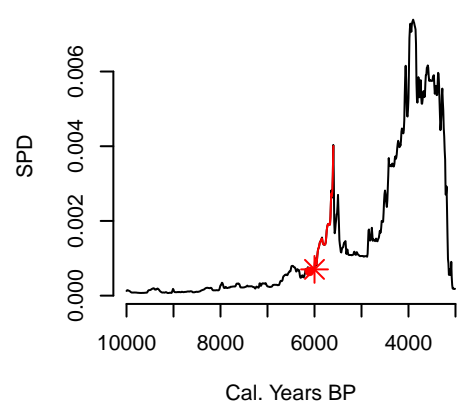

### C. AR[1]

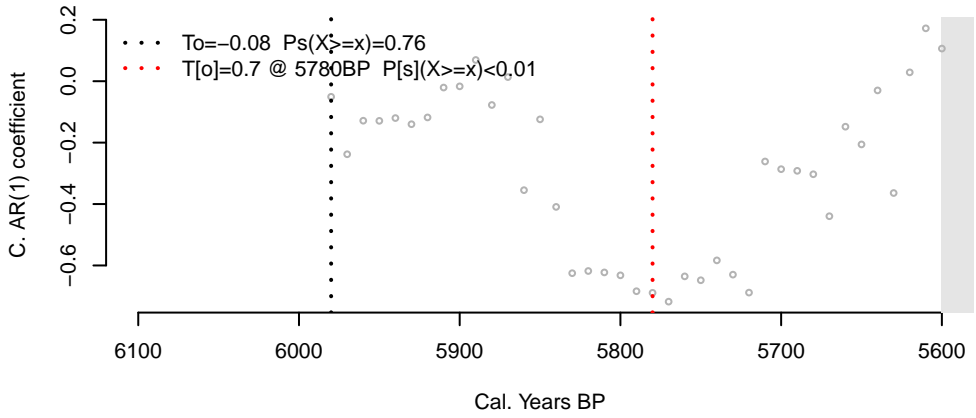

### D. AR[1]{Te}

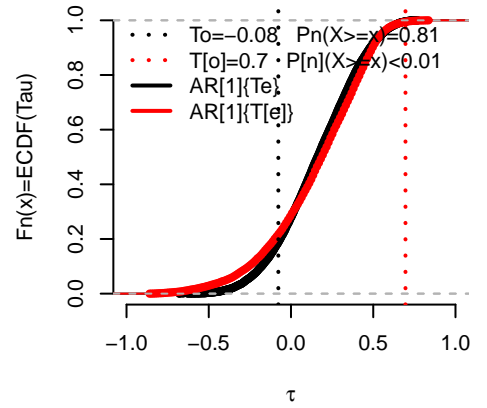

### E. Standard Deviation

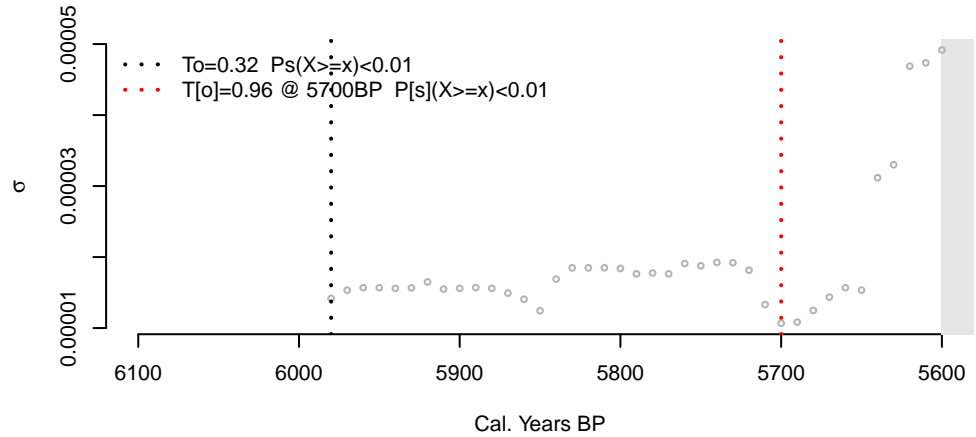

### F. SD{Te}

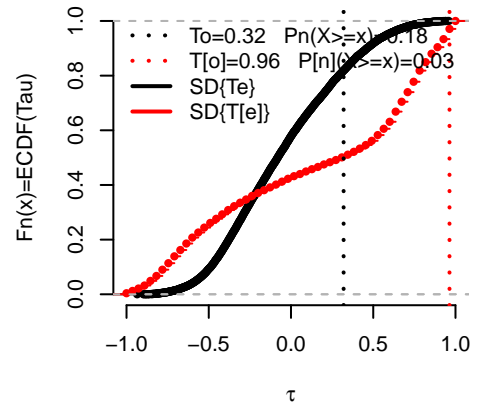

### G. Skewness

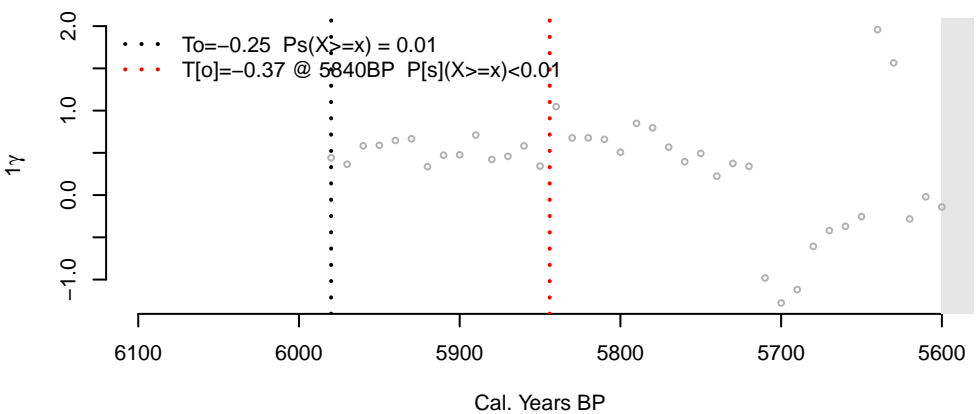

### H. SK{Tau sim}

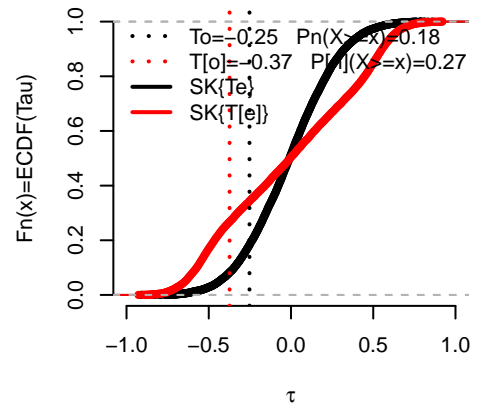

**A. Paris Basin beginning of increase to collapse**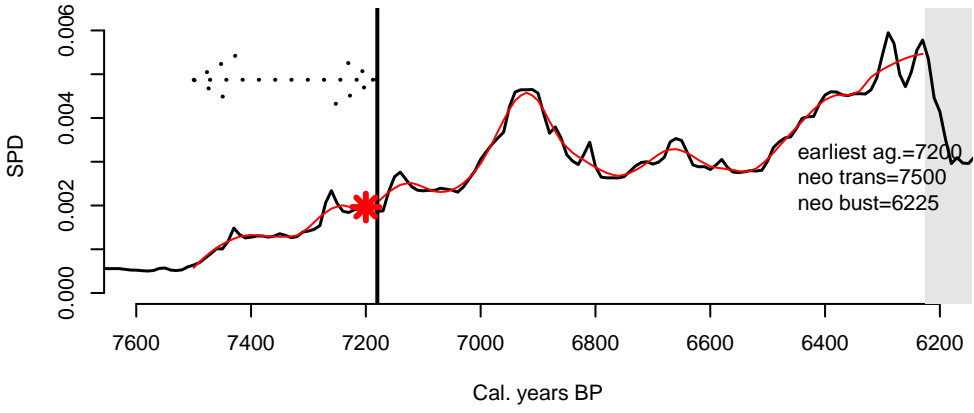**B. Complete time series**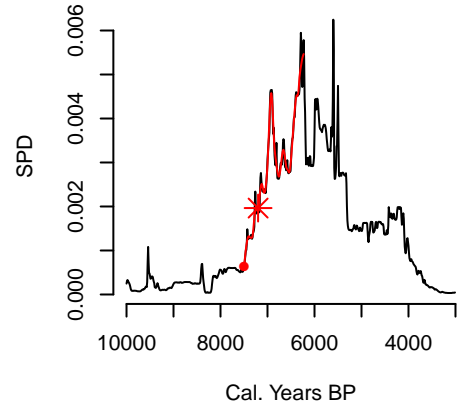**C. AR[1]**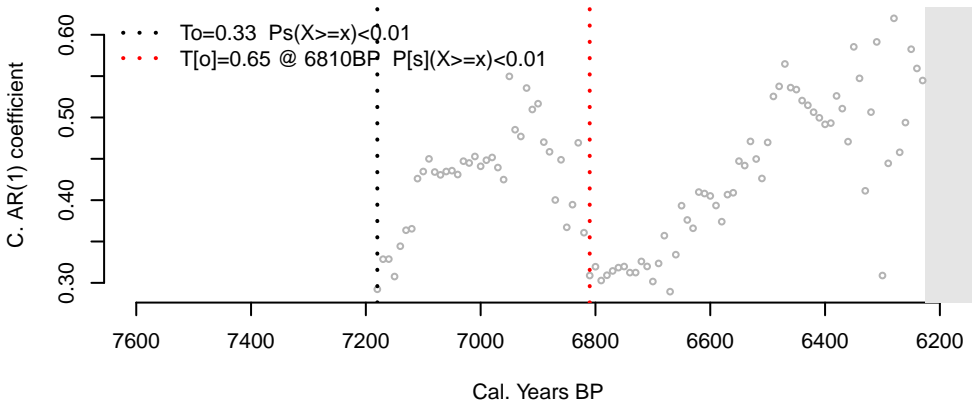**D. AR[1]{Te}**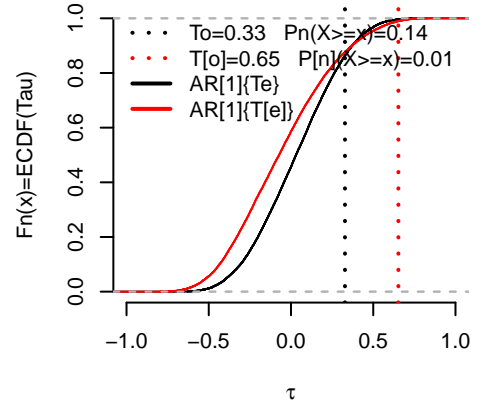**E. Standard Deviation**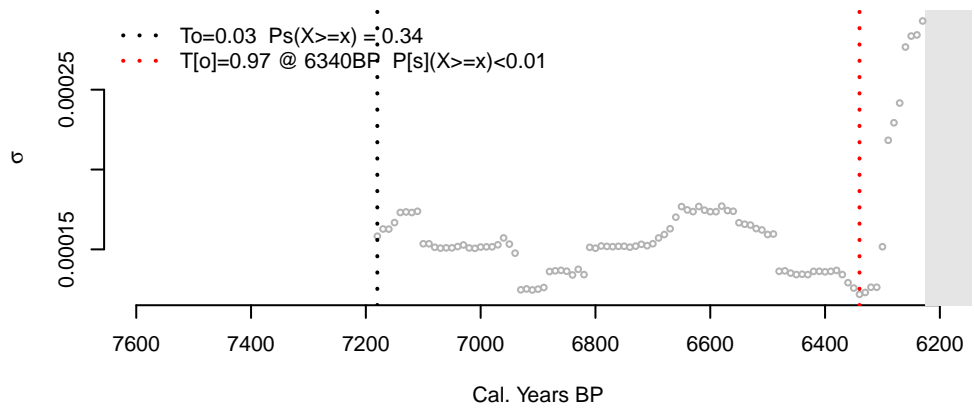**F. SD{Te}**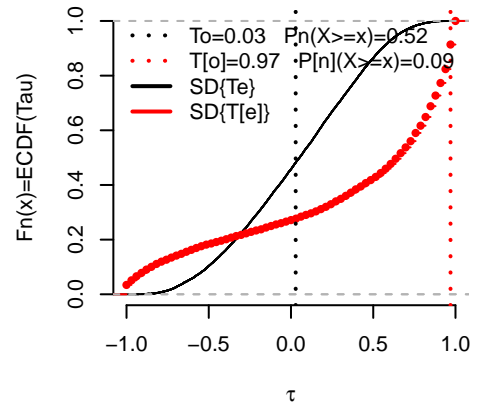**G. Skewness**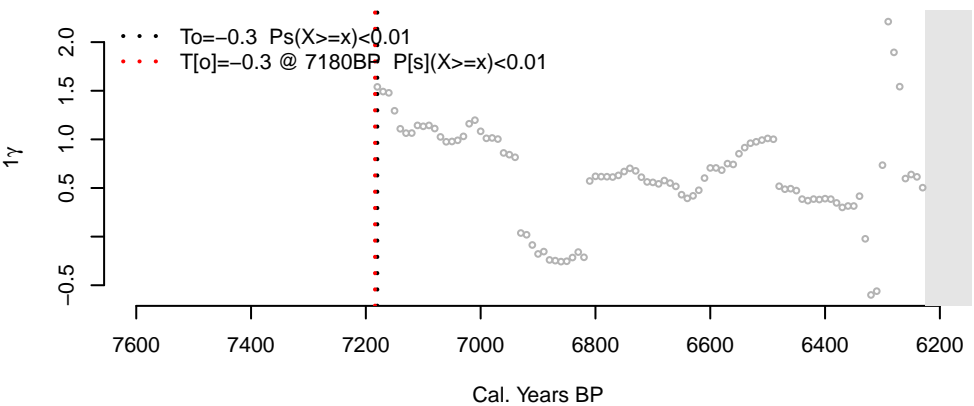**H. SK{Tau sim}**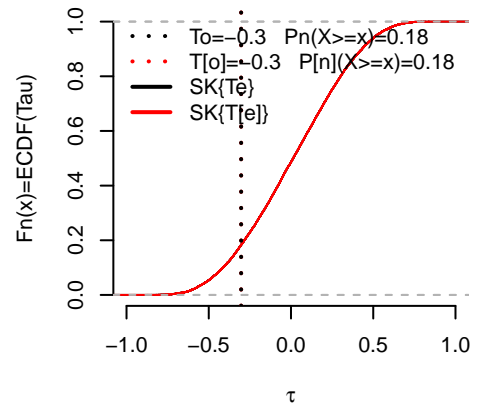

**A. Rhone-Languedoc beginning of increase to collapse**

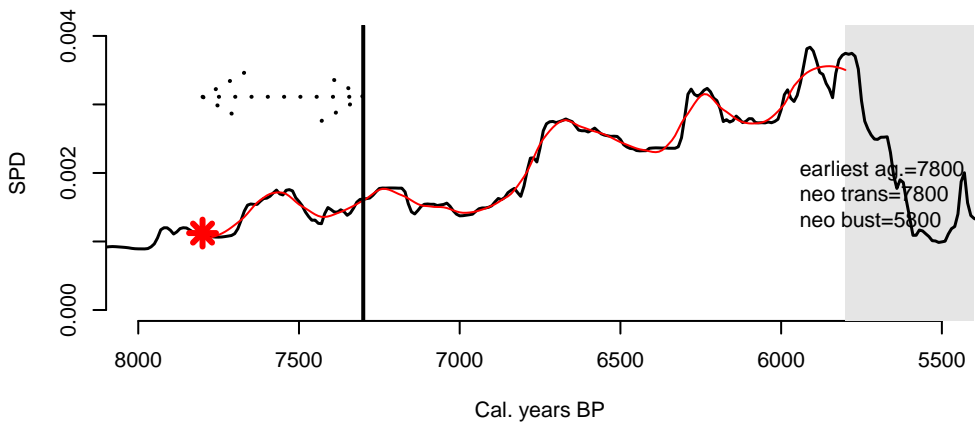

**B. Complete time series**

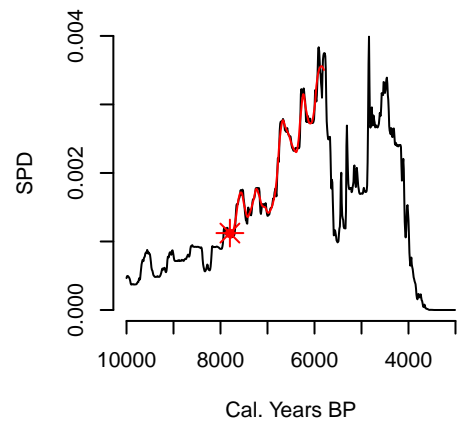

**C. AR[1]**

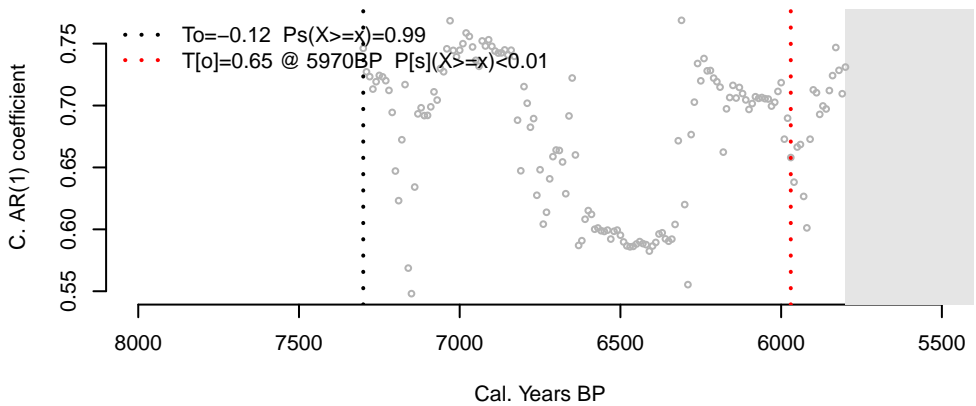

**D. AR[1]{Te}**

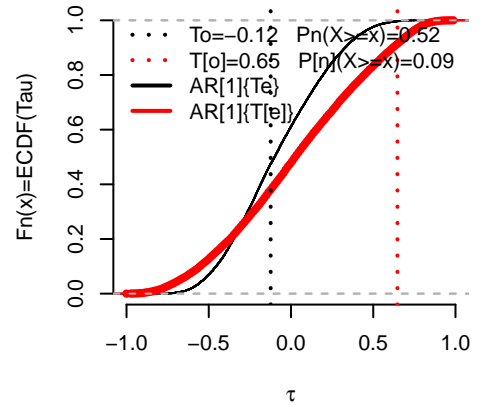

**E. Standard Deviation**

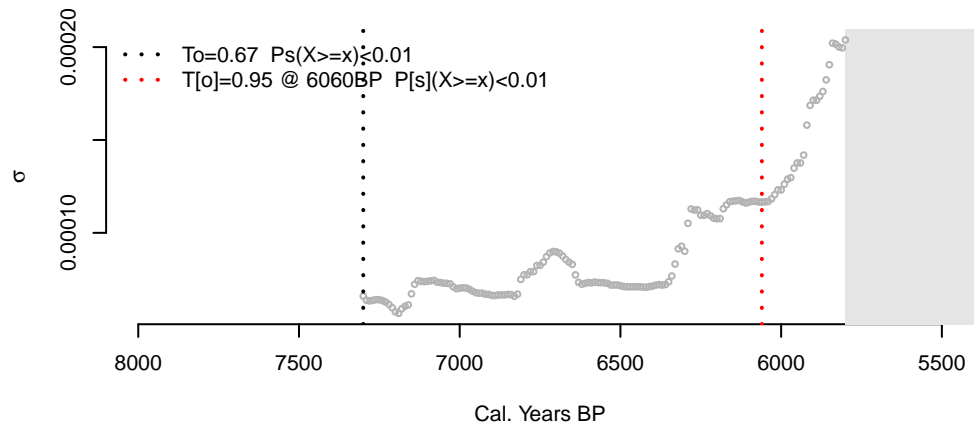

**F. SD{Te}**

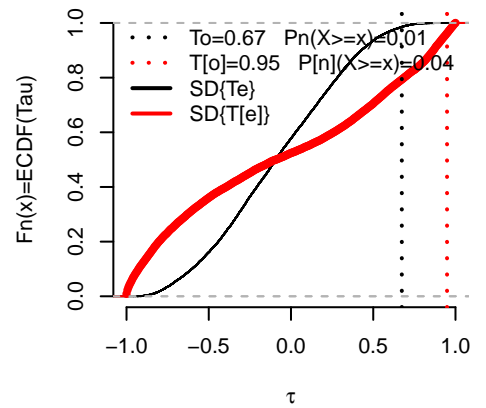

**G. Skewness**

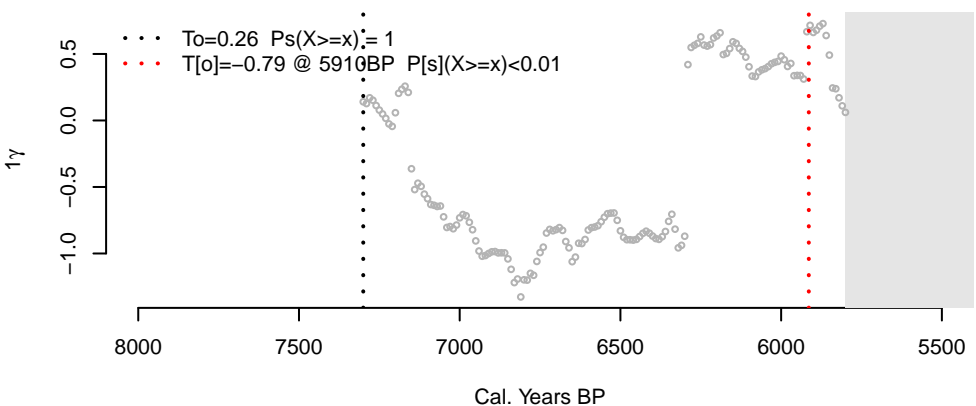

**H. SK{Tau sim}**

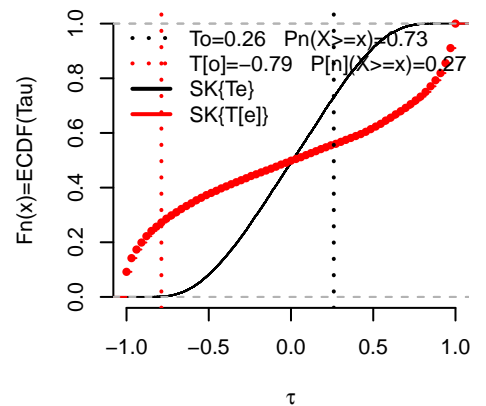



### A. Scotland beginning of increase to collapse

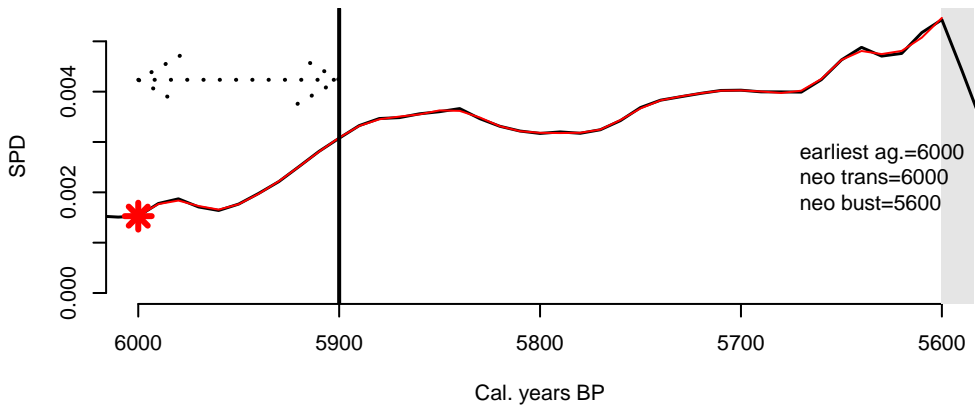

### B. Complete time series

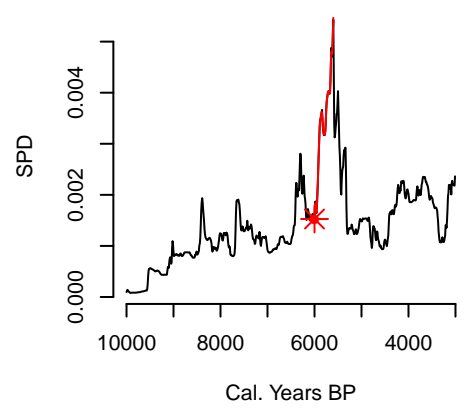

### C. AR[1]

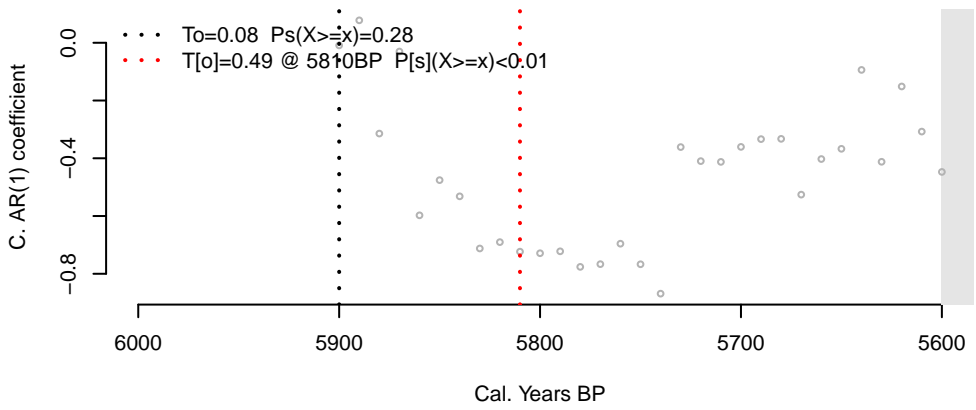

### D. AR[1]{Te}

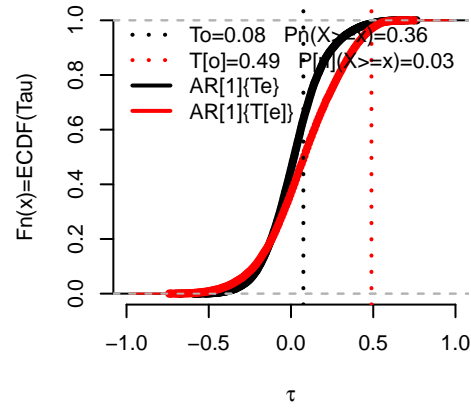

### E. Standard Deviation

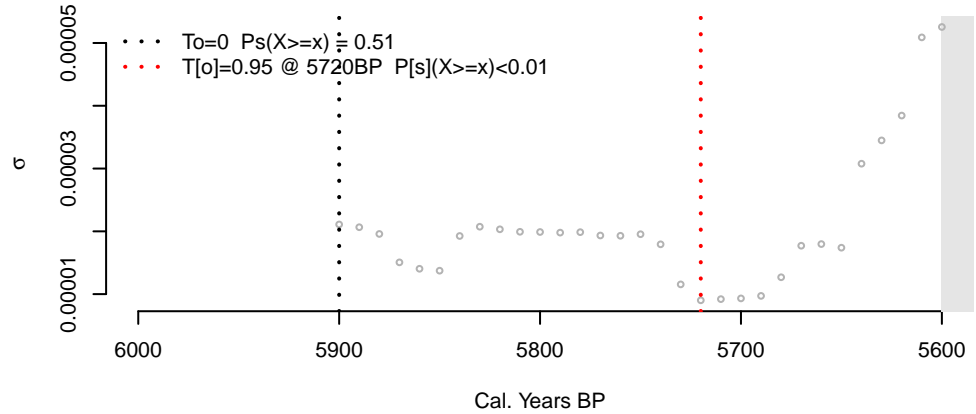

### F. SD{Te}

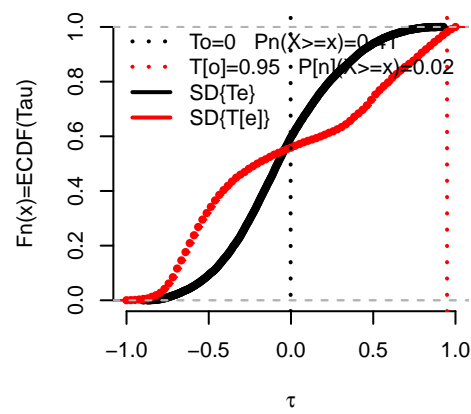

### G. Skewness

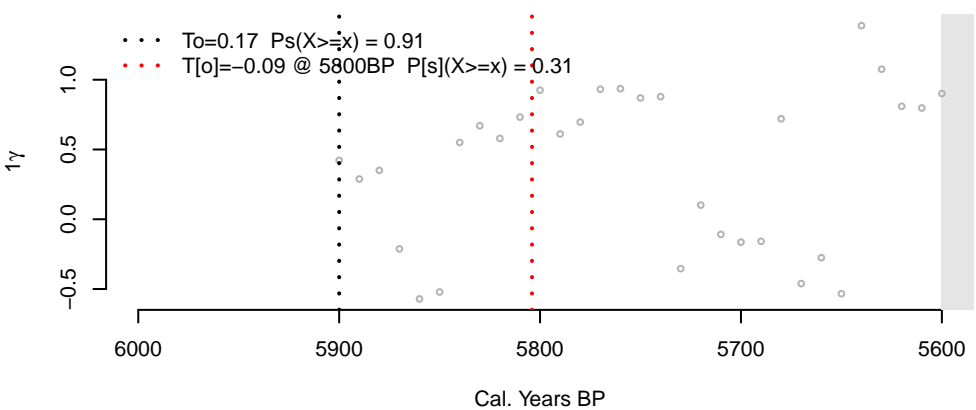

### H. SK{Tau sim}

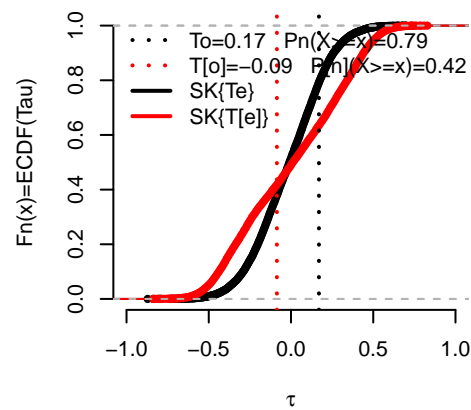

### A. Southern England (Wessex & Sussex) beginning of increase to collapse

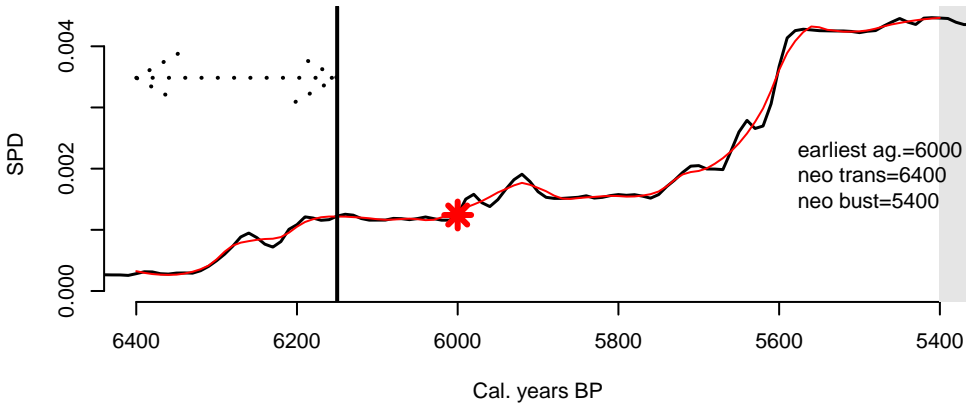

### B. Complete time series

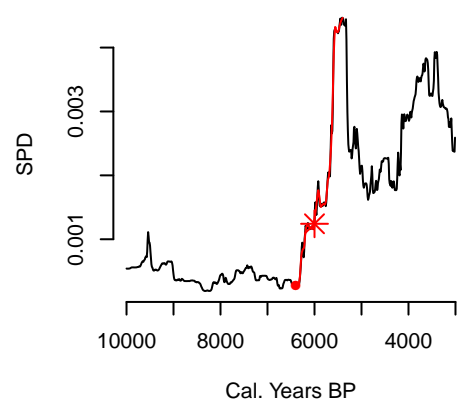

### C. AR[1]

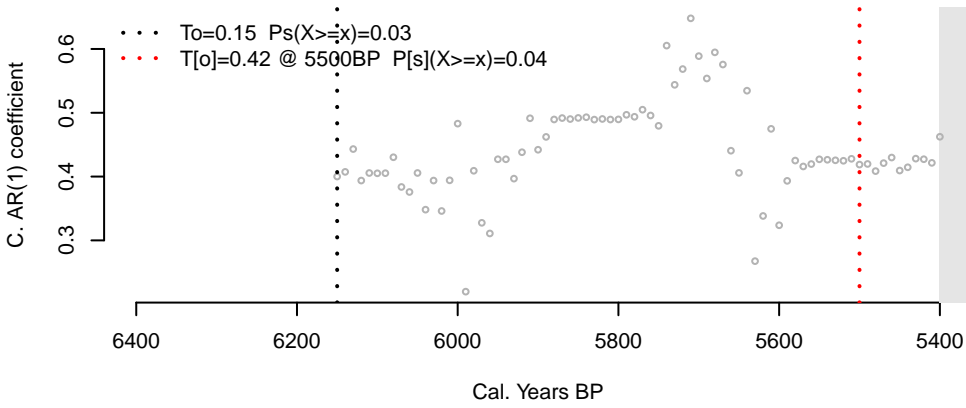

### D. AR[1]{Te}

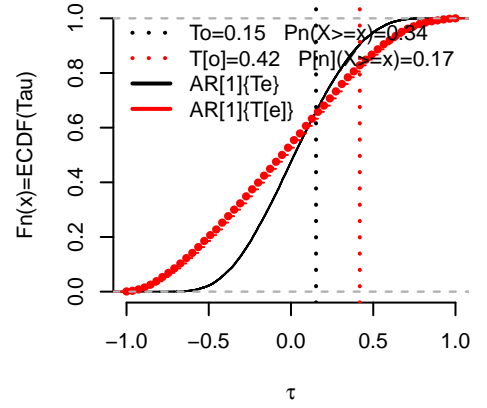

### E. Standard Deviation

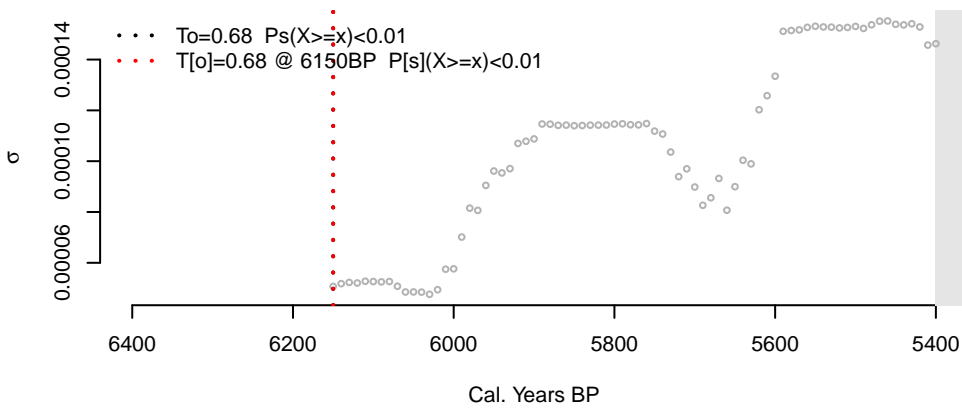

### F. SD{Te}

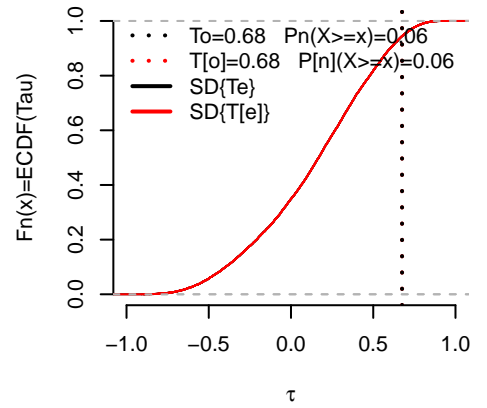

### G. Skewness

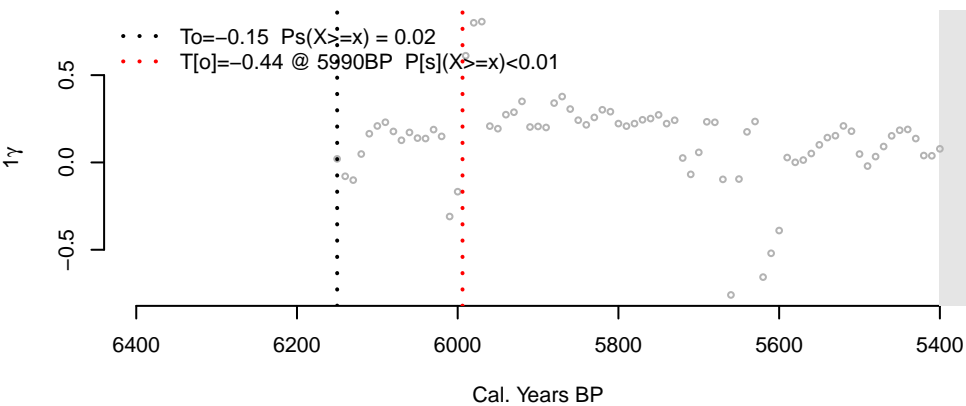

### H. SK{Tau sim}

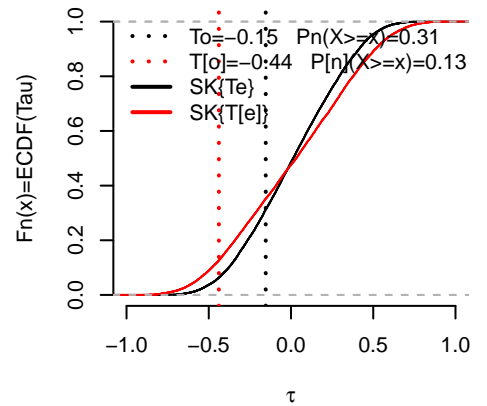

**A. Western France beginning of increase to collapse**

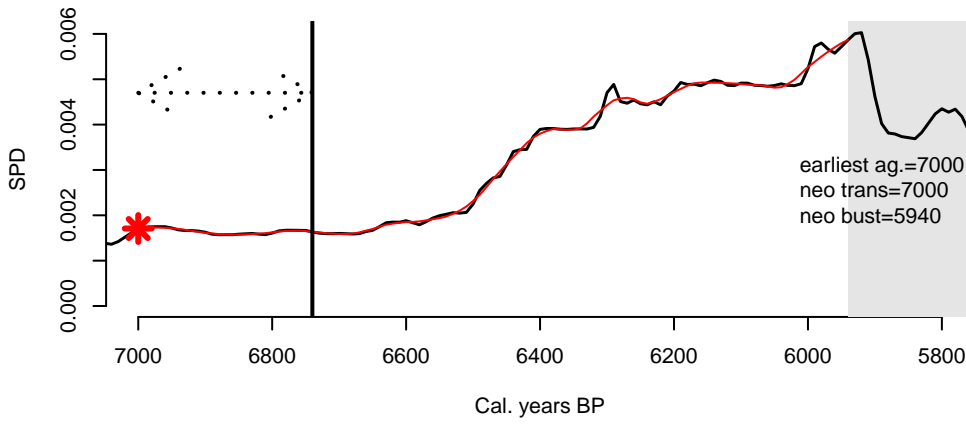

**B. Complete time series**

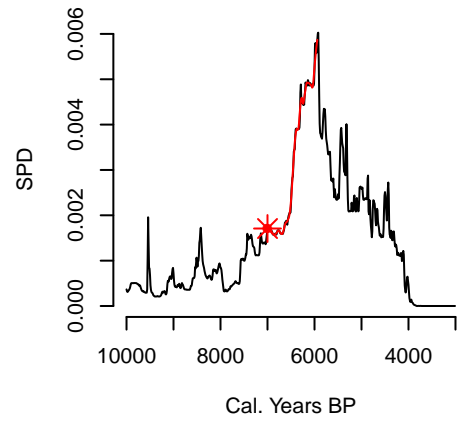

**C. AR[1]**

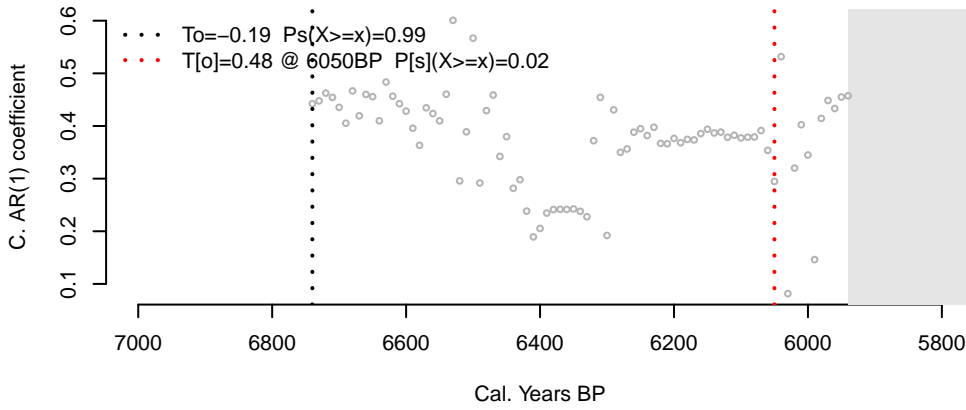

**D. AR[1]{Te}**

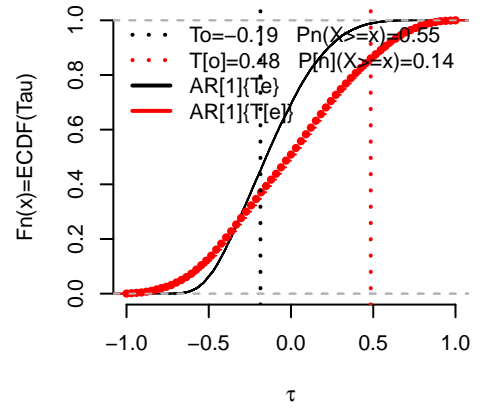

**E. Standard Deviation**

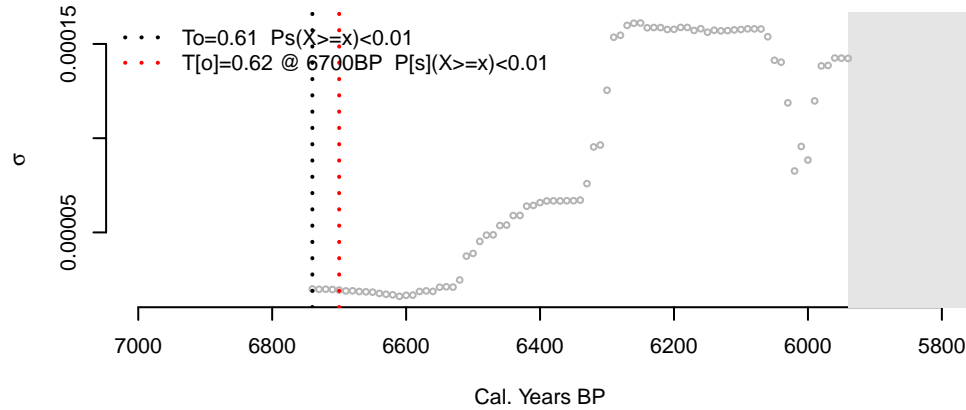

**F. SD{Te}**

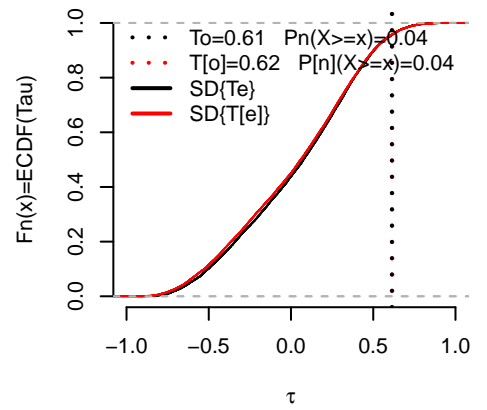

**G. Skewness**

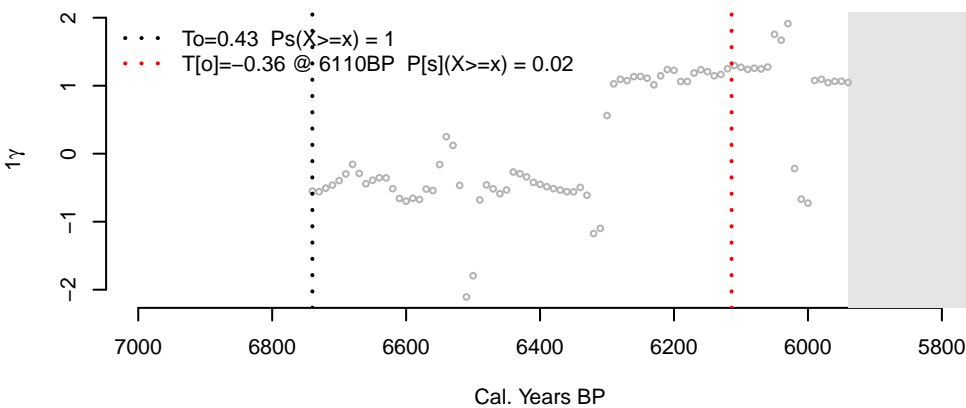

**H. SK{Tau sim}**

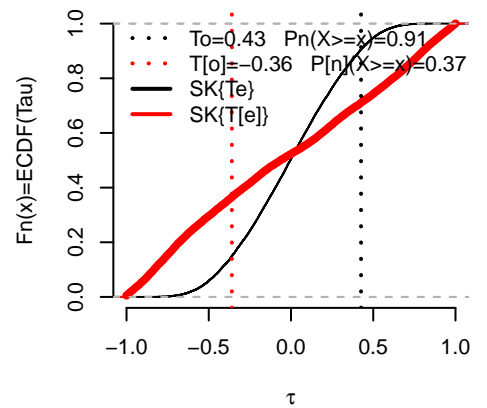

**Wavelet analysis for all regions.**

### Southern Germany

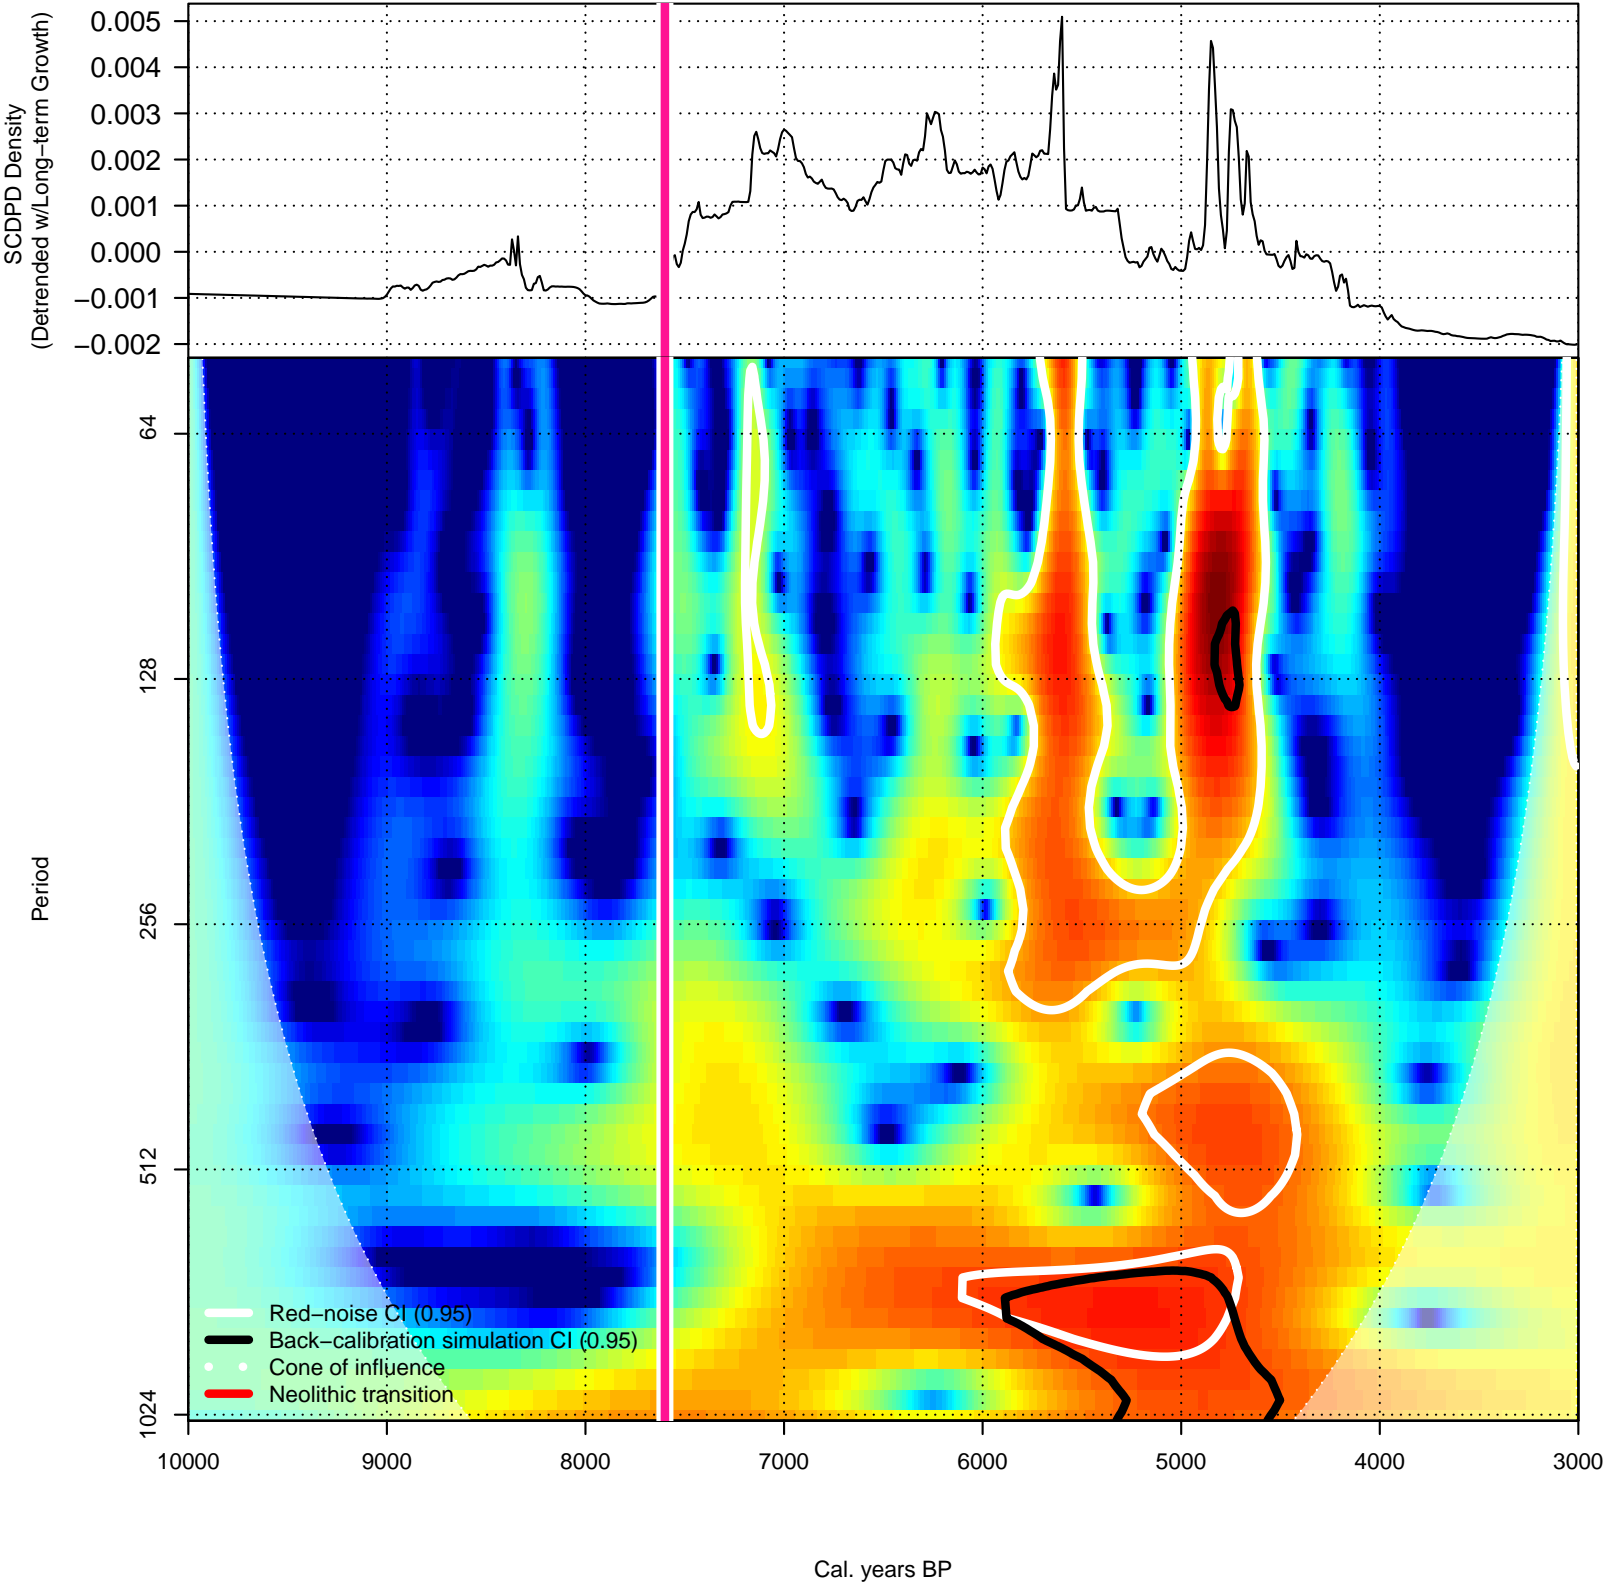

# Eastern Switzerland

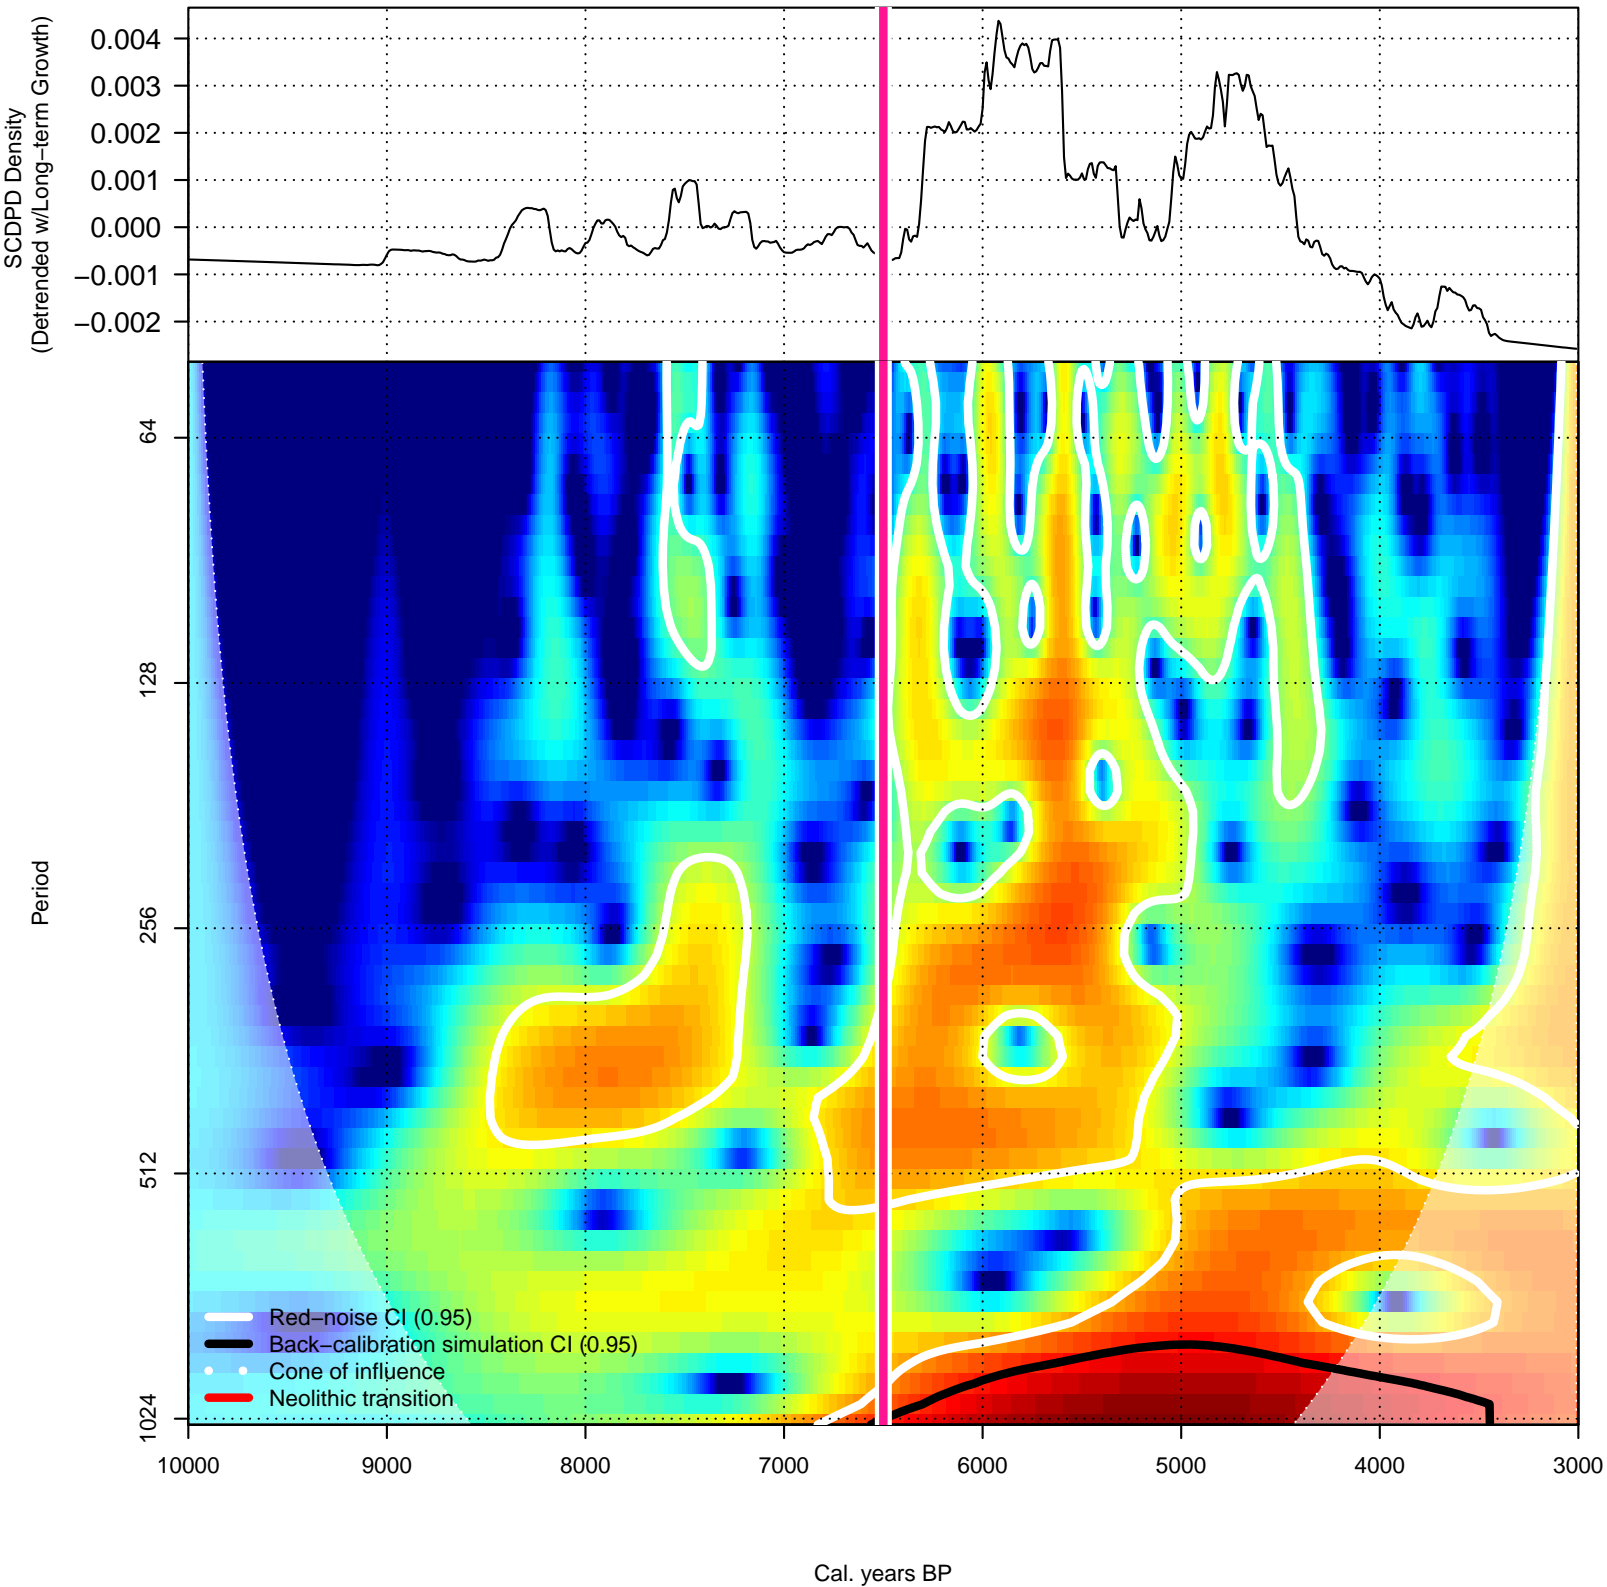

### England and Wales (w/o Wessex & Sussex)

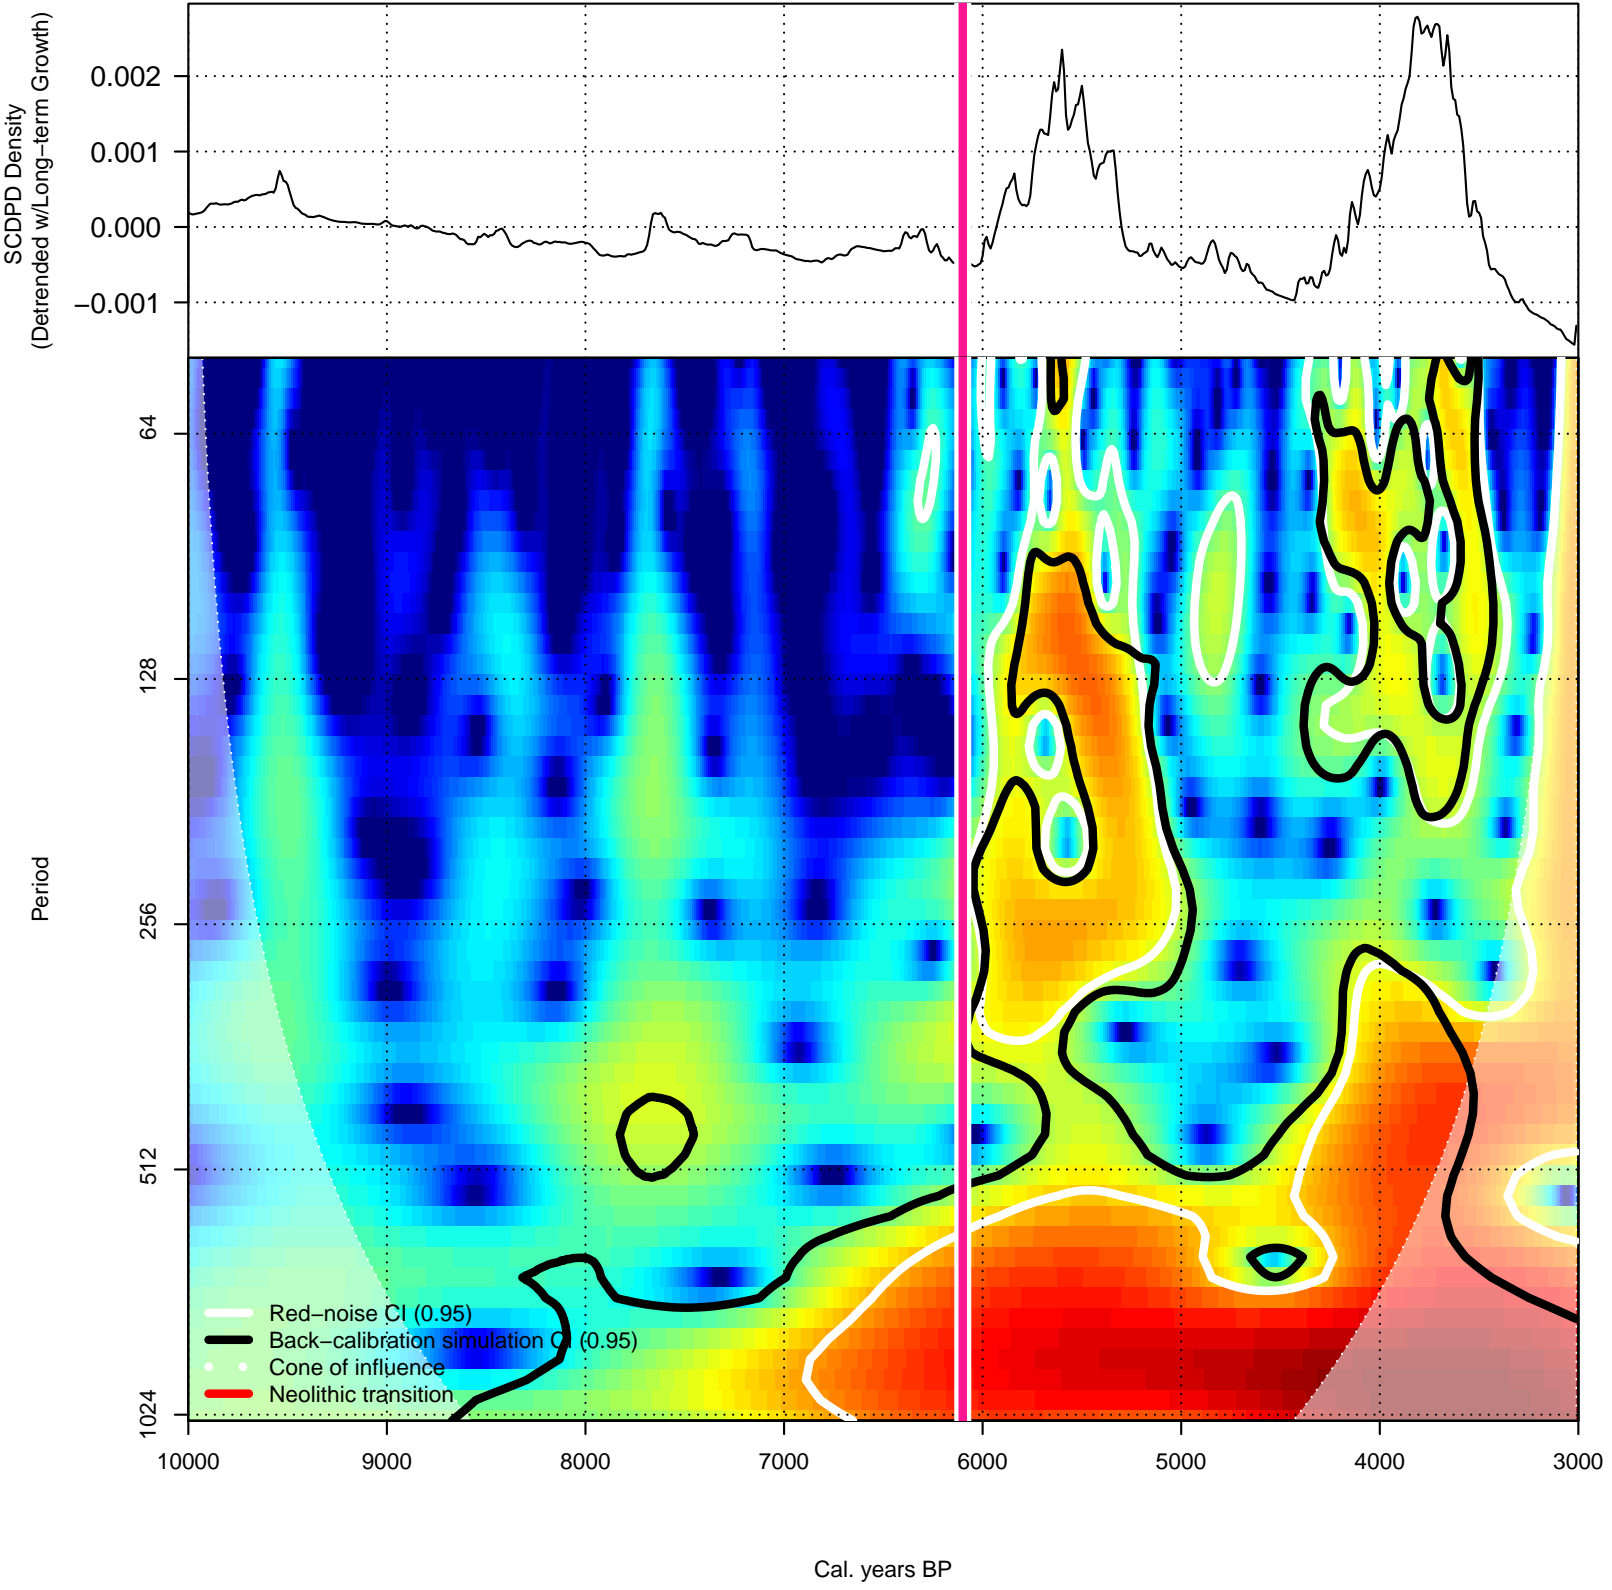

# Ireland

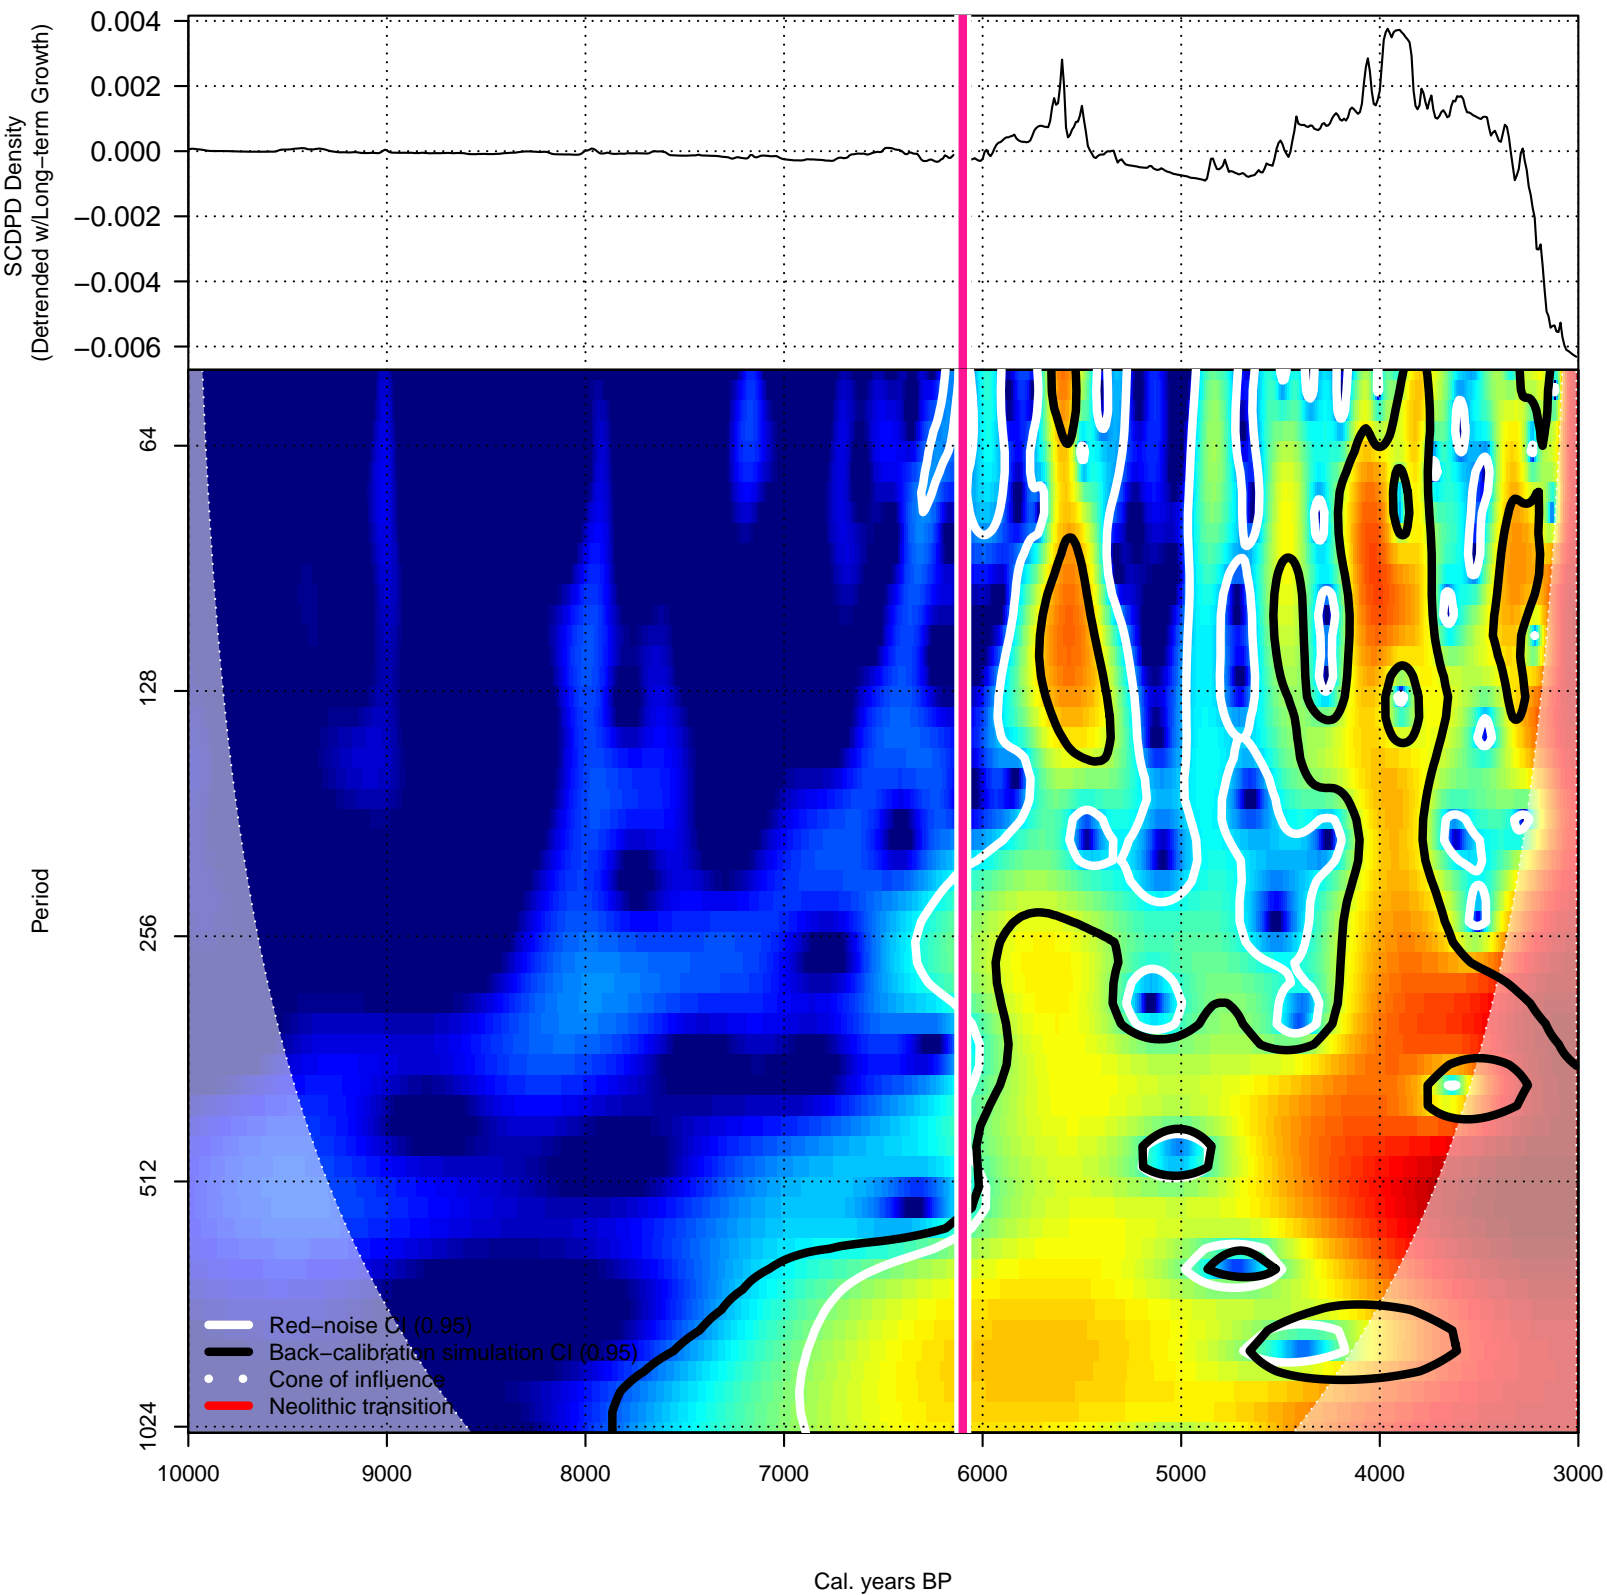



# Paris Basin

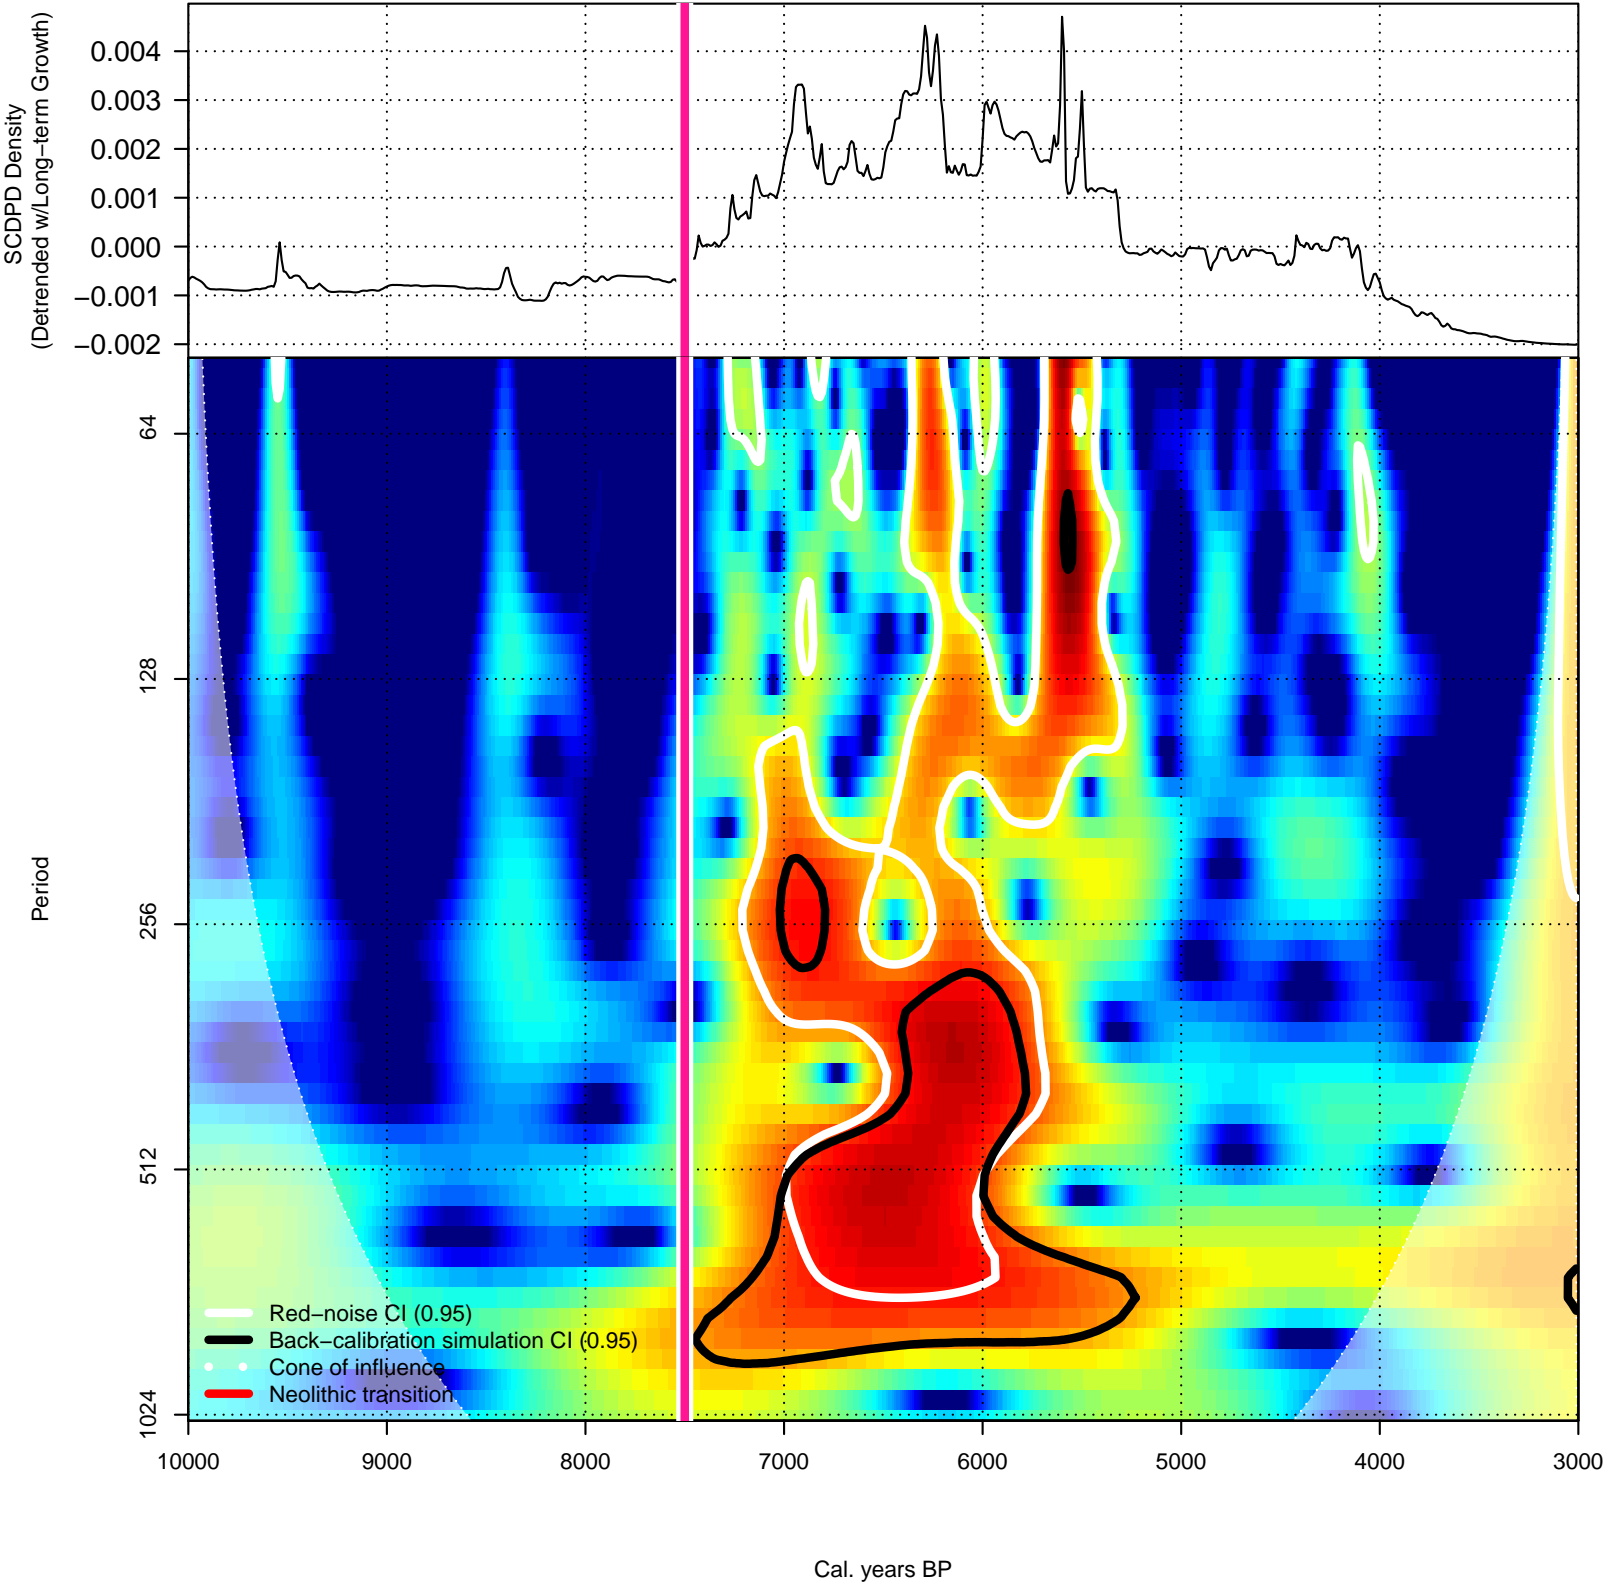

# Rhone-Languedoc

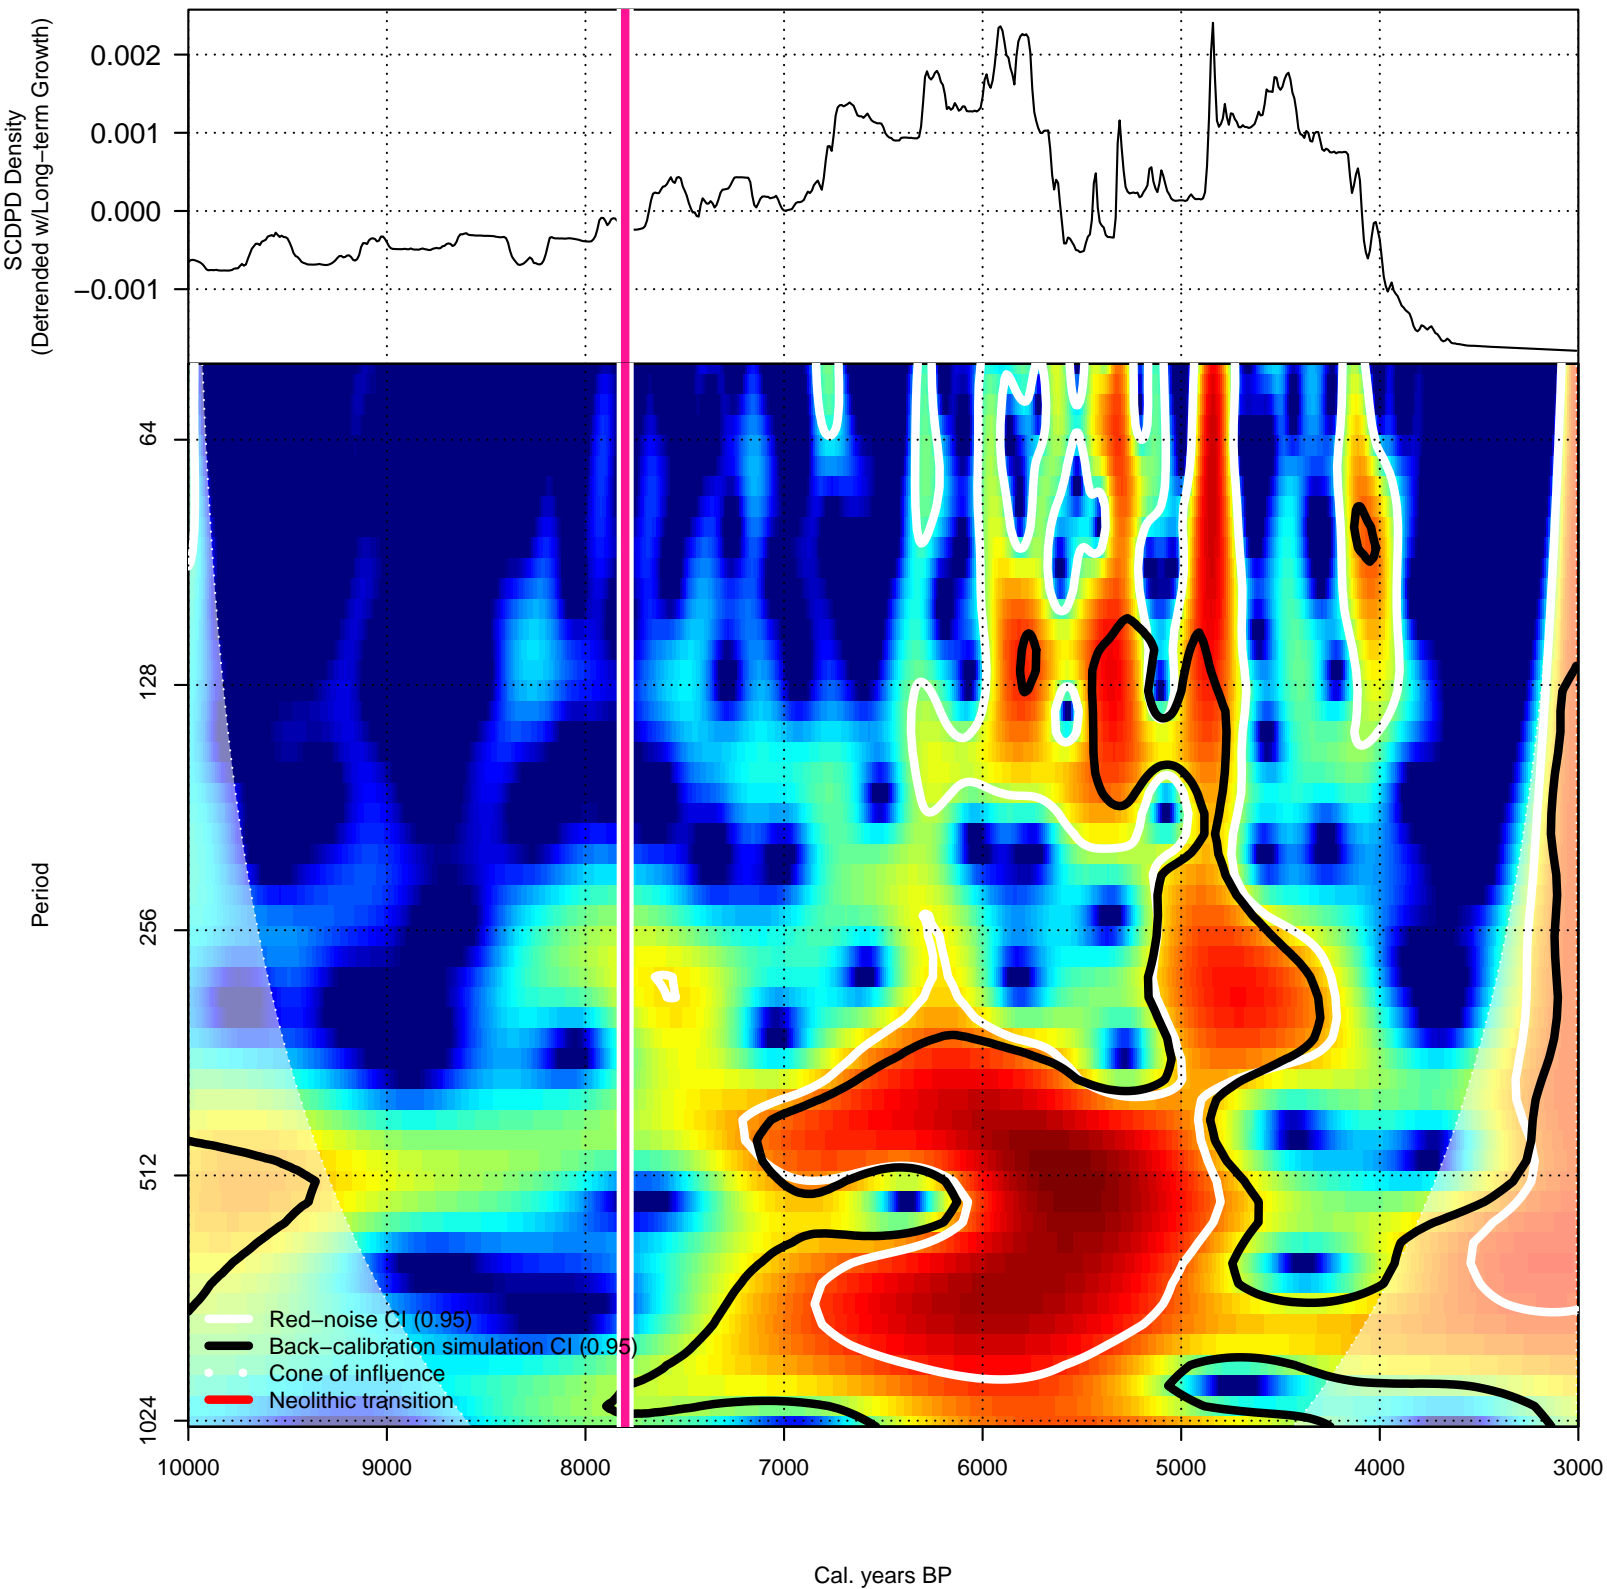

# Scotland

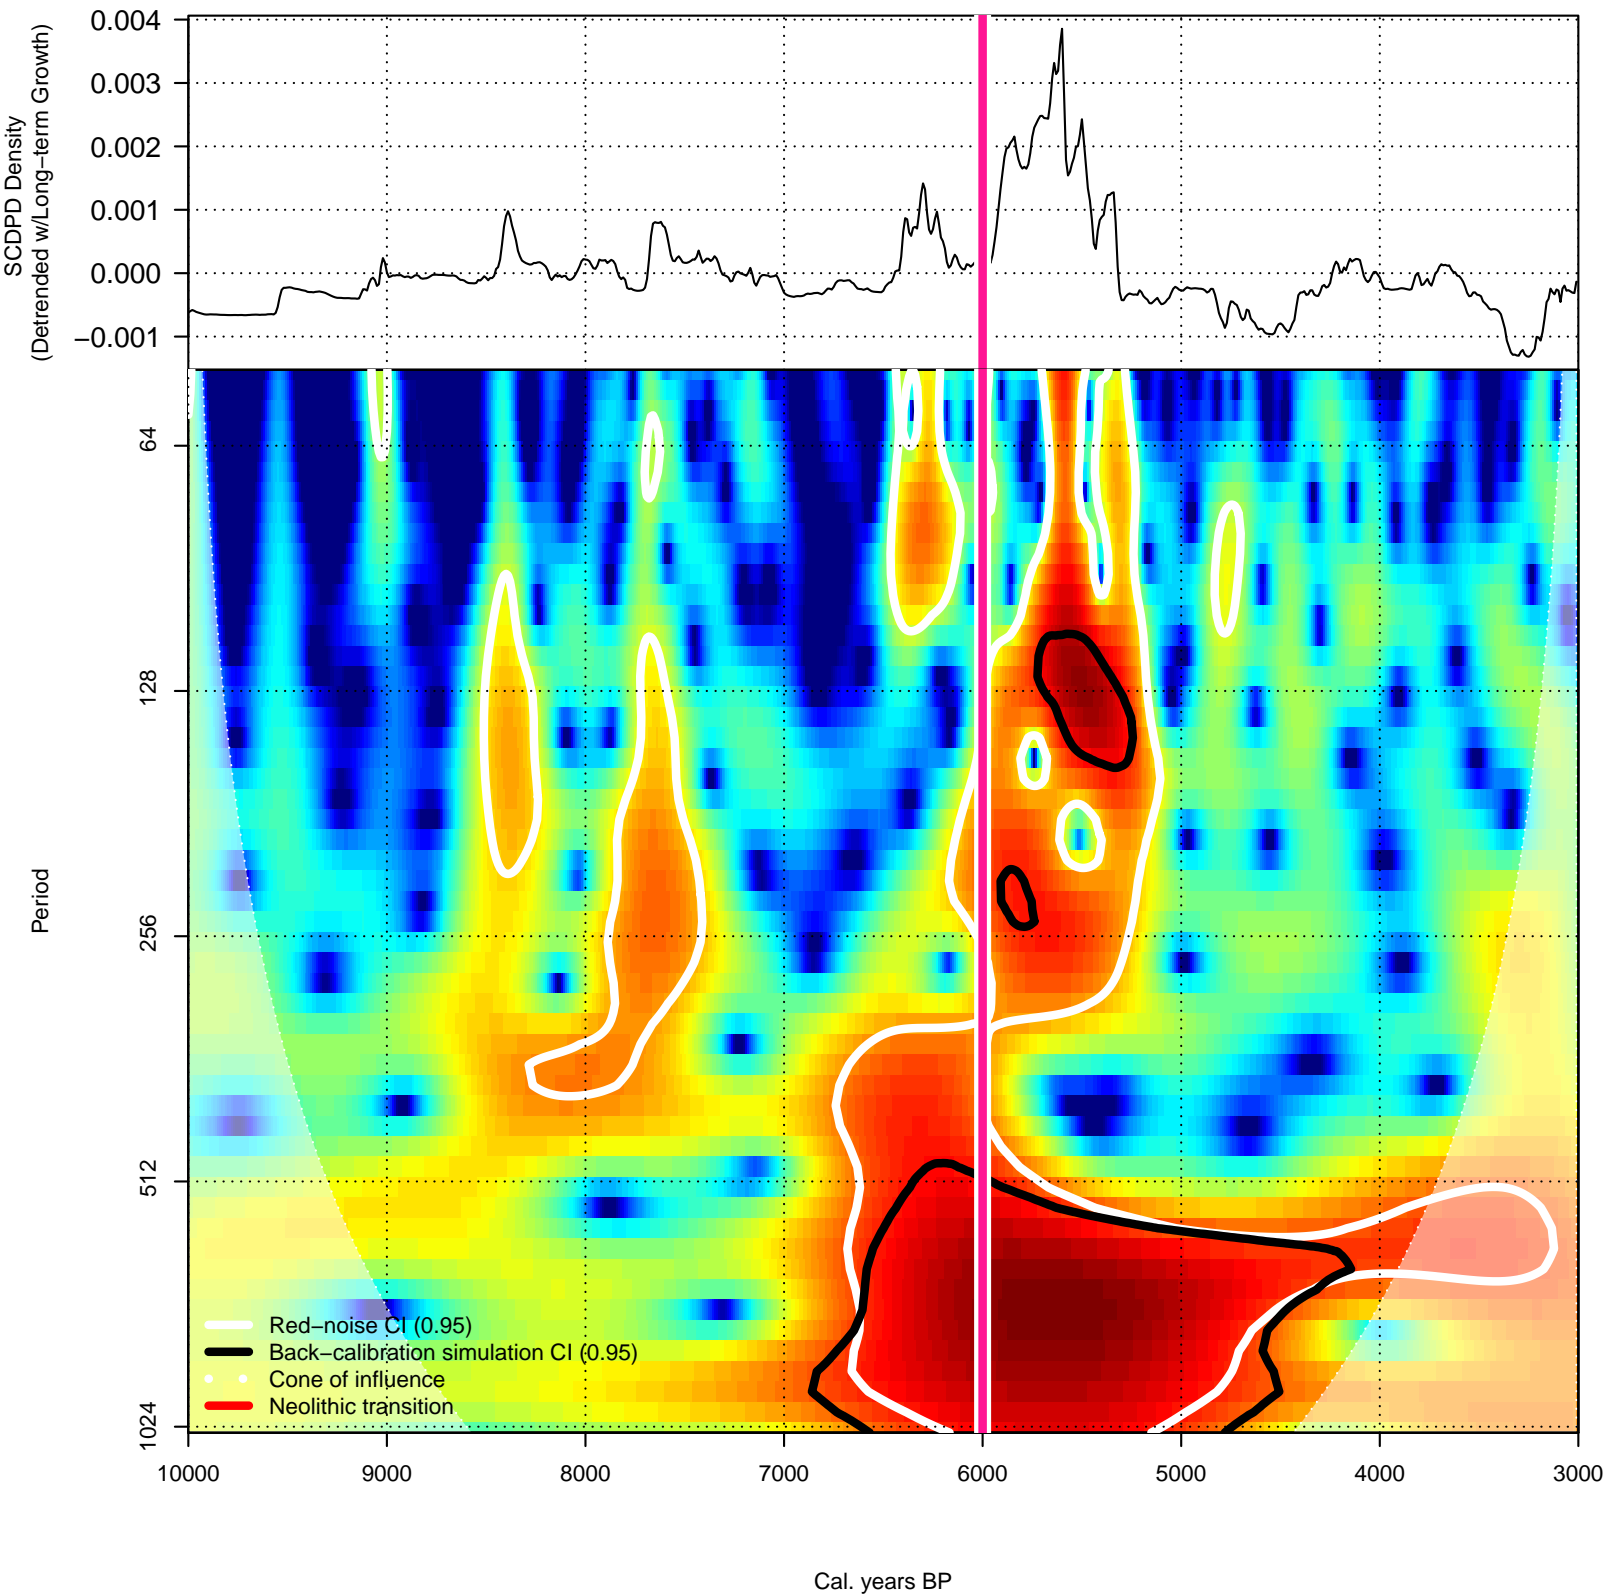

### Southern England (Wessex & Sussex)

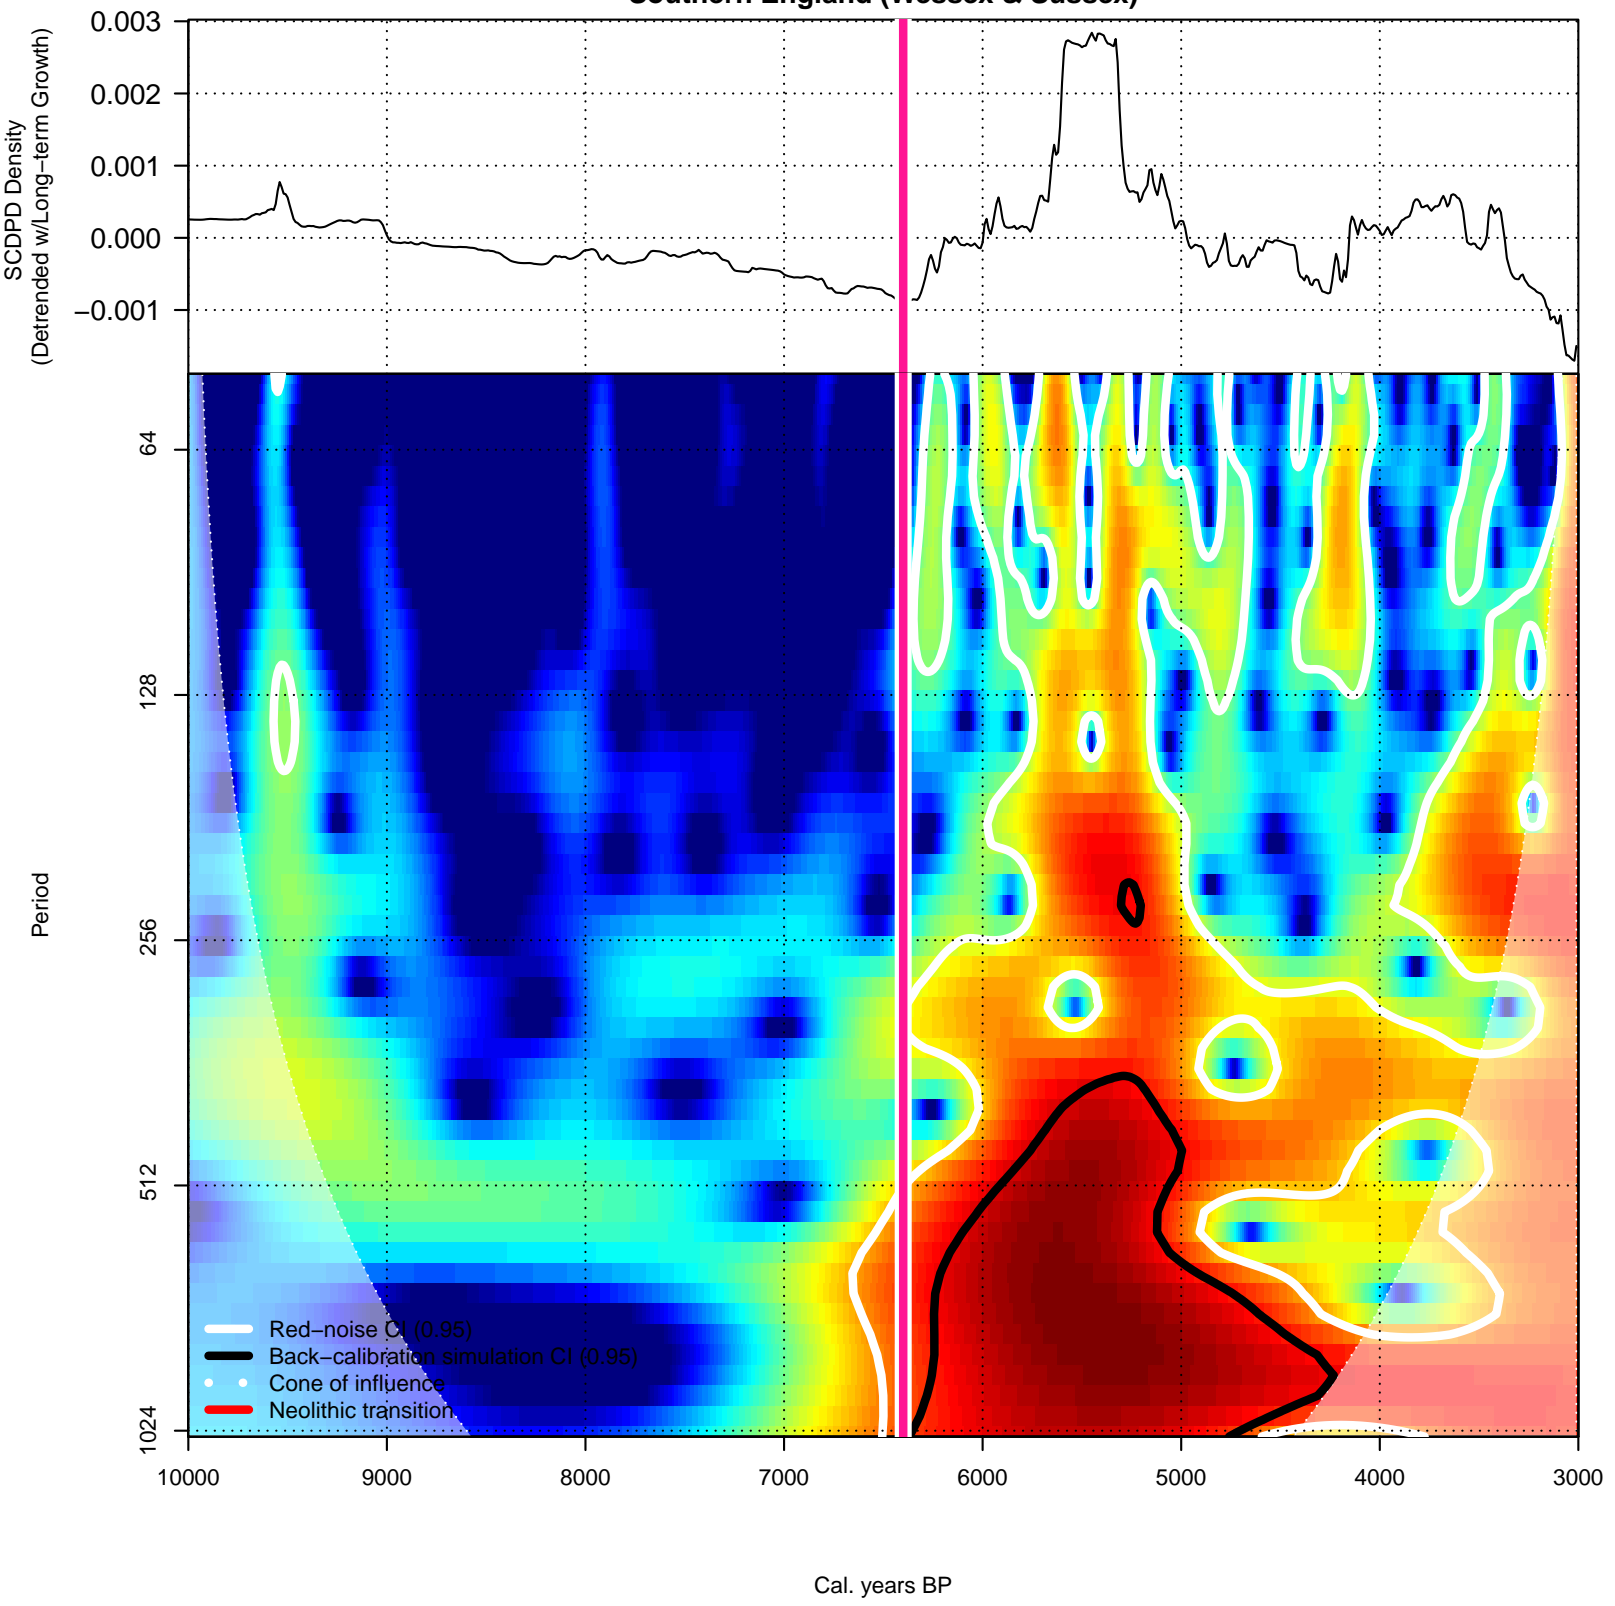

# Western France

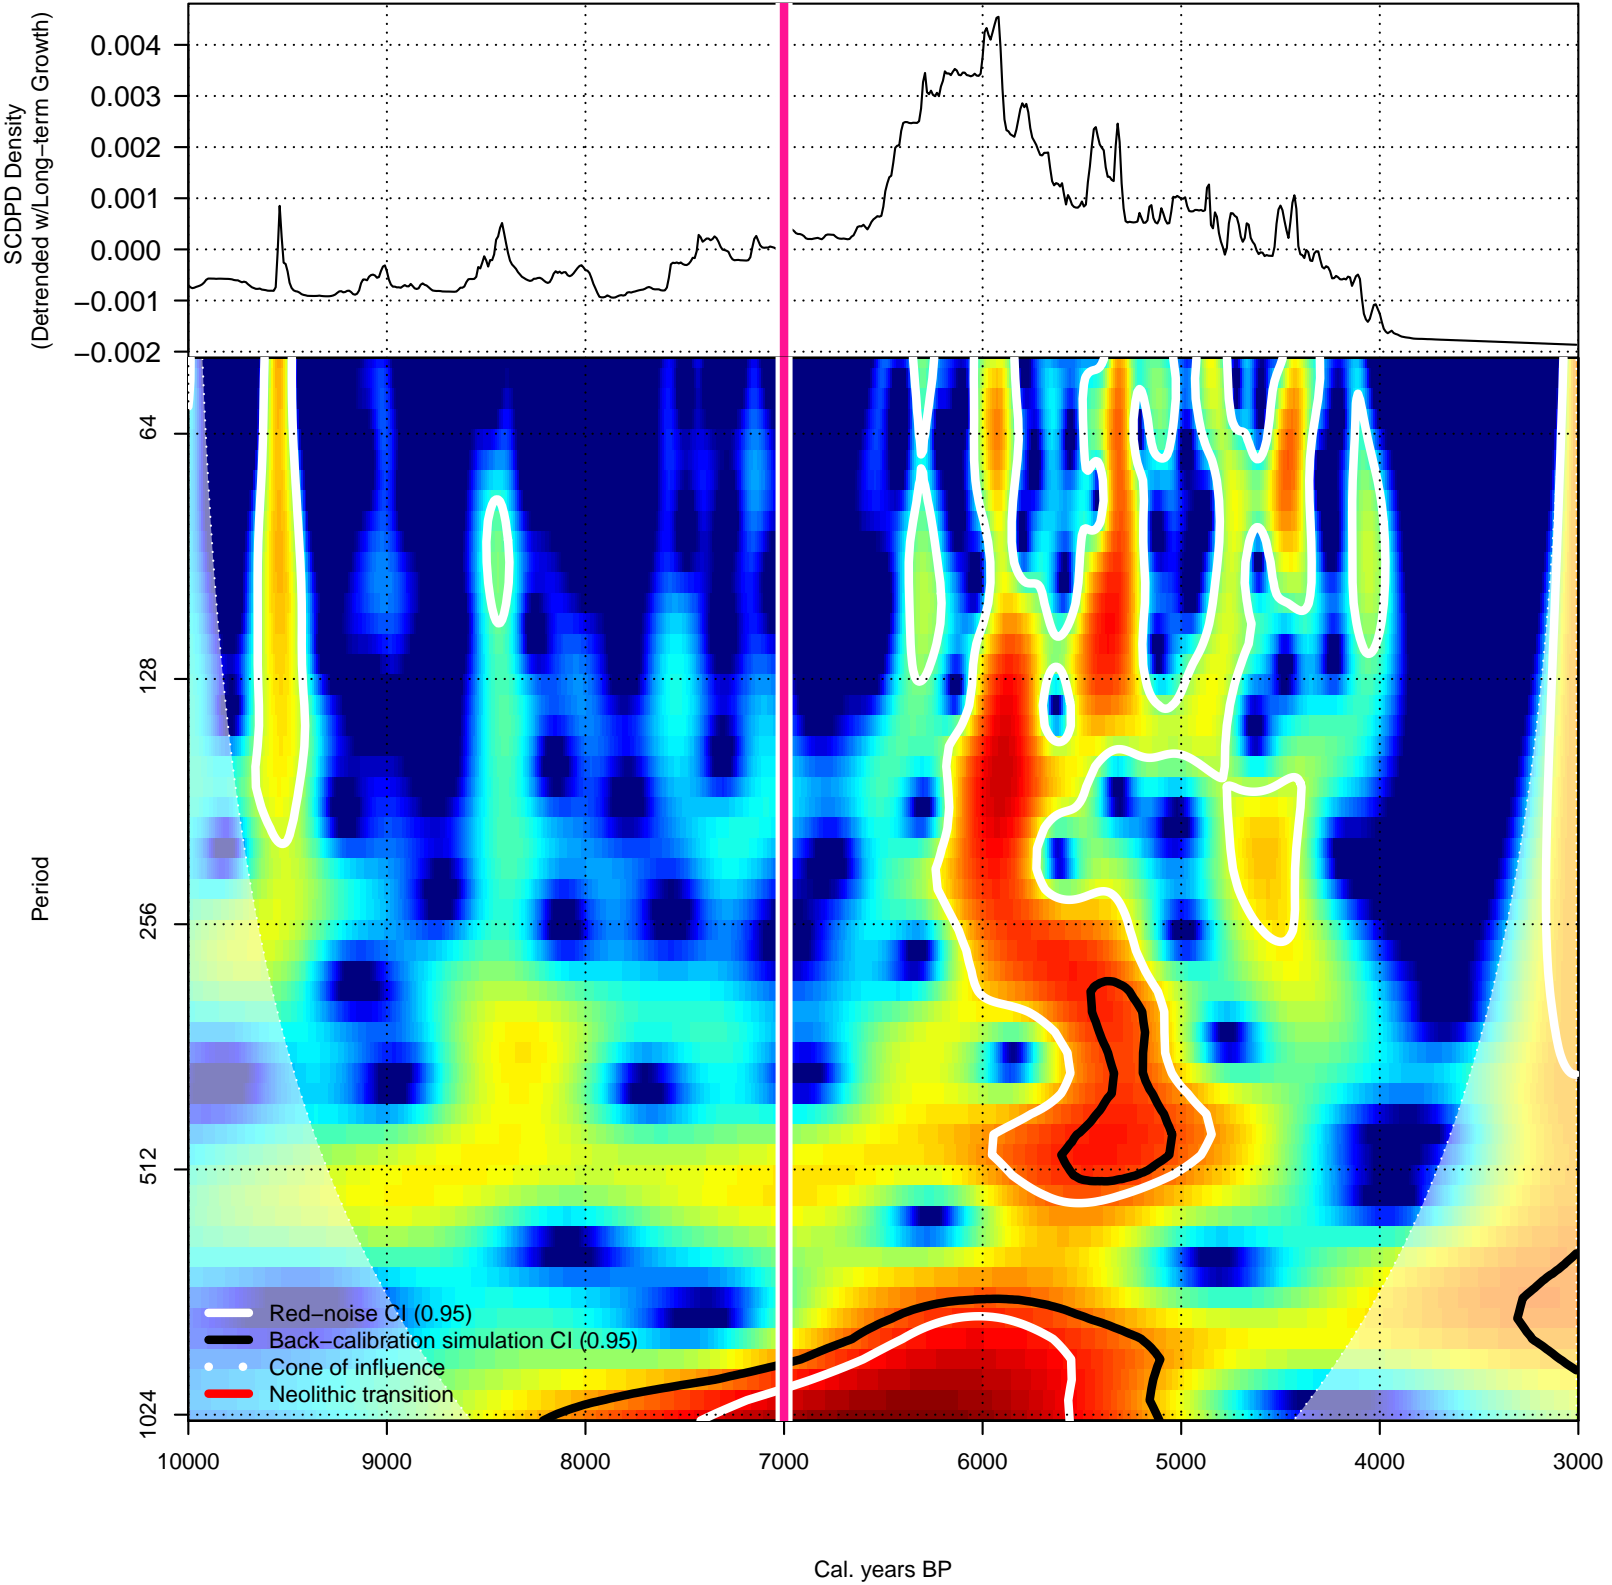

**EWS sensitivity analysis for all regions.**

# Southern Germany

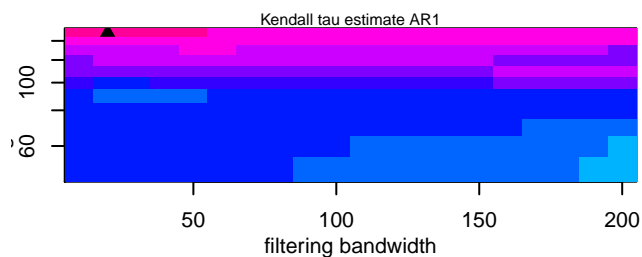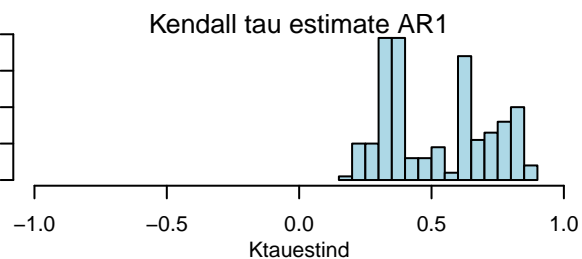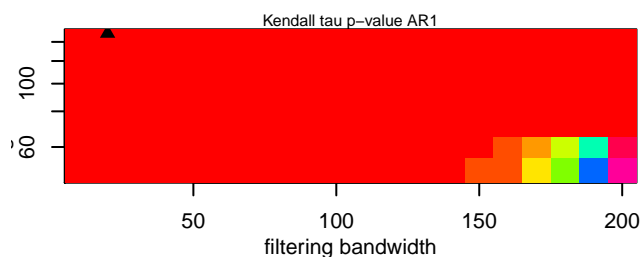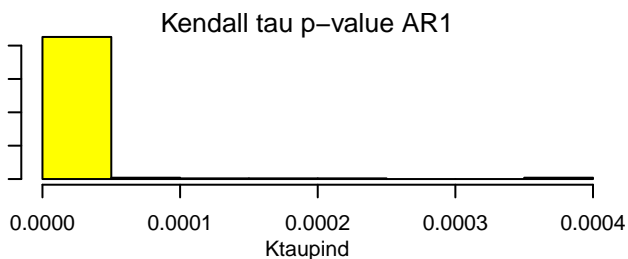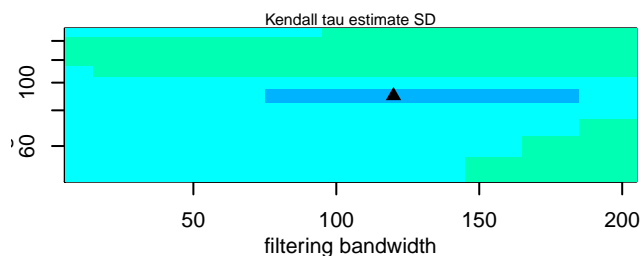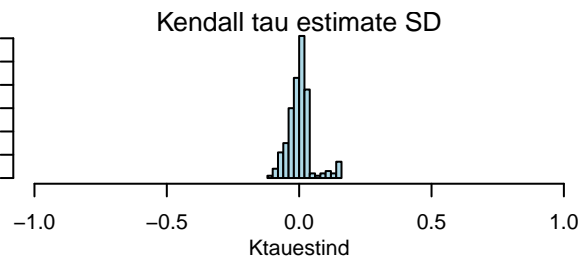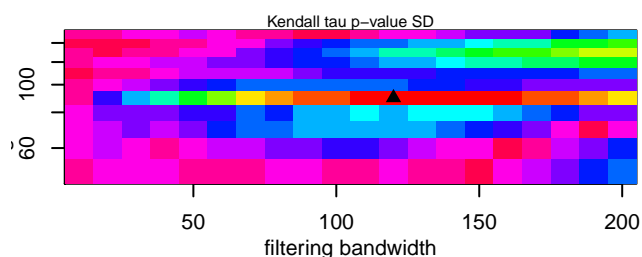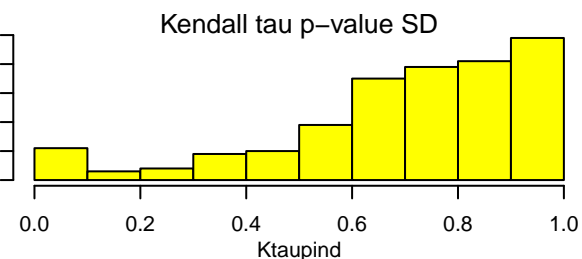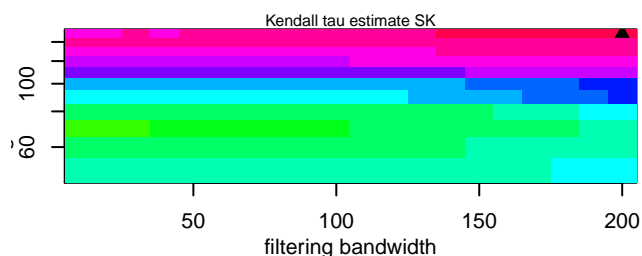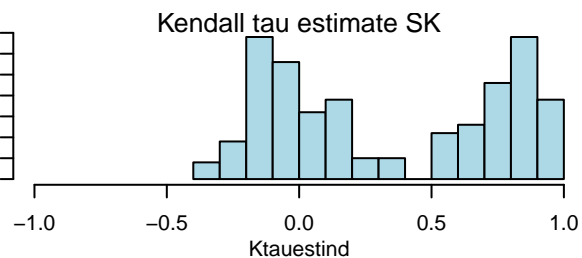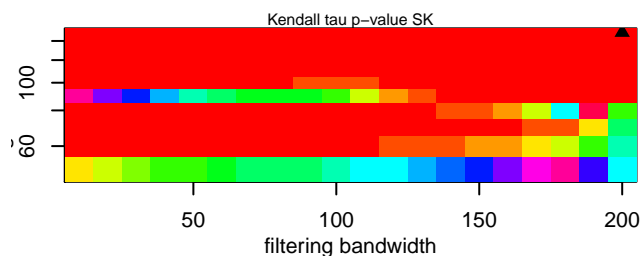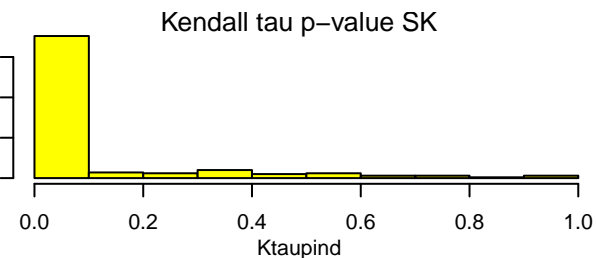

# Eastern Switzerland

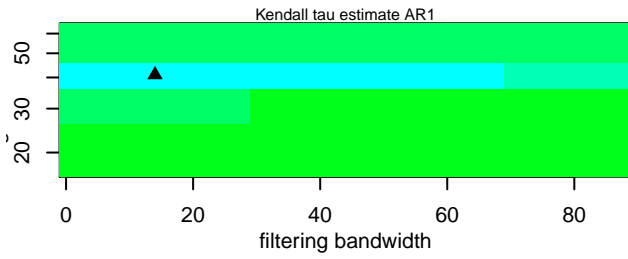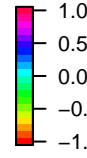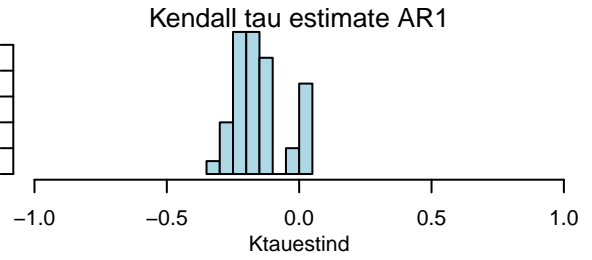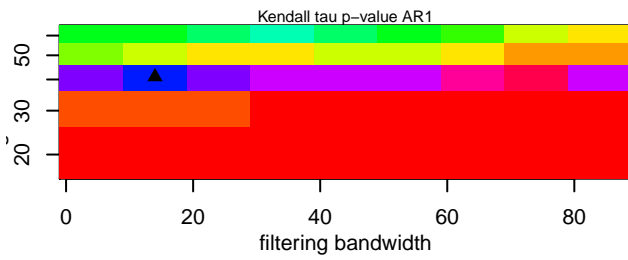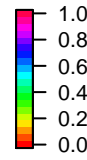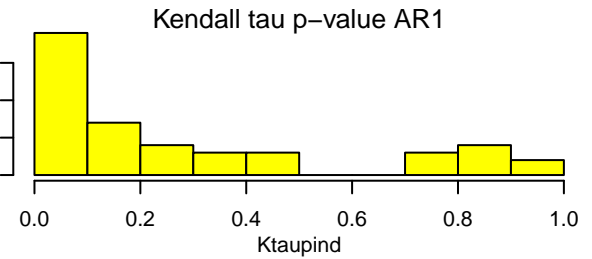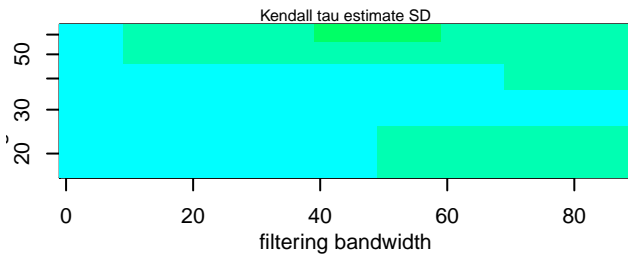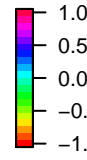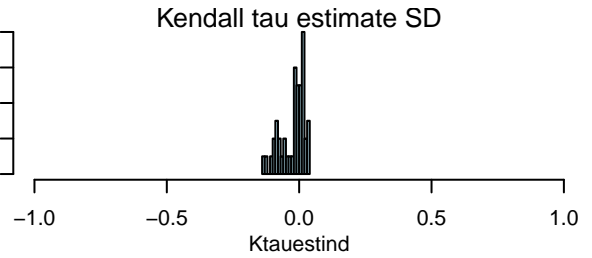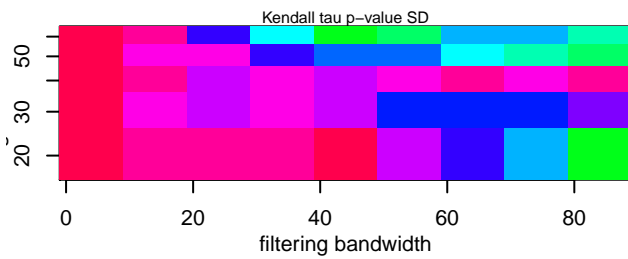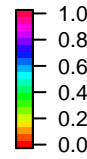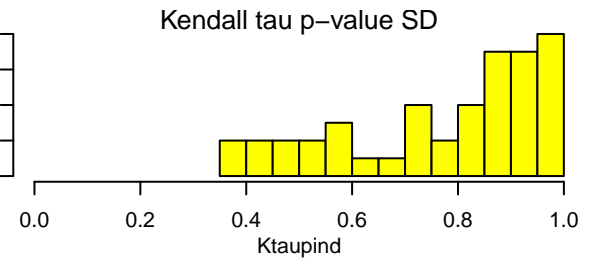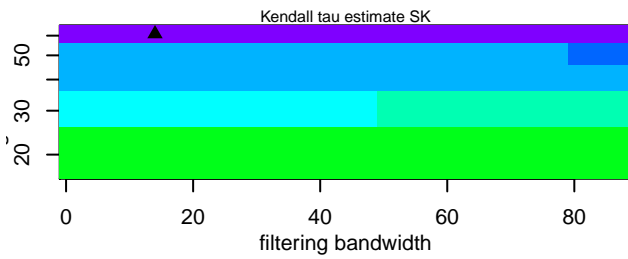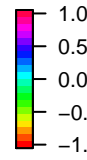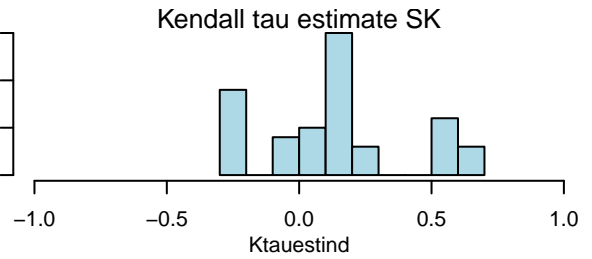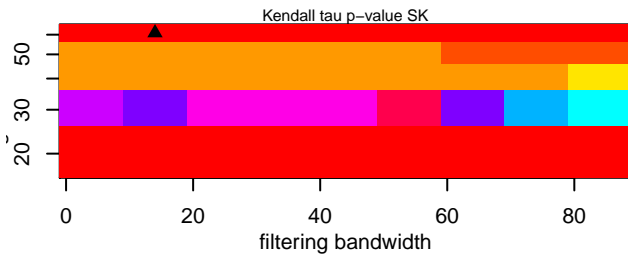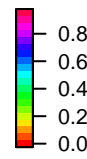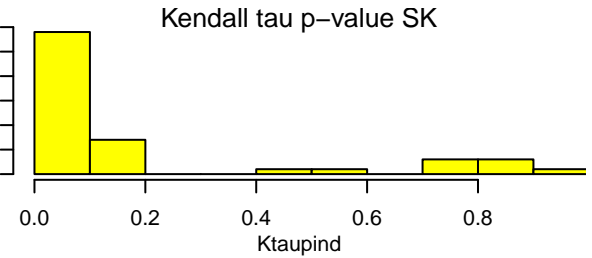



# England and Wales (w/o Wessex & Sussex)

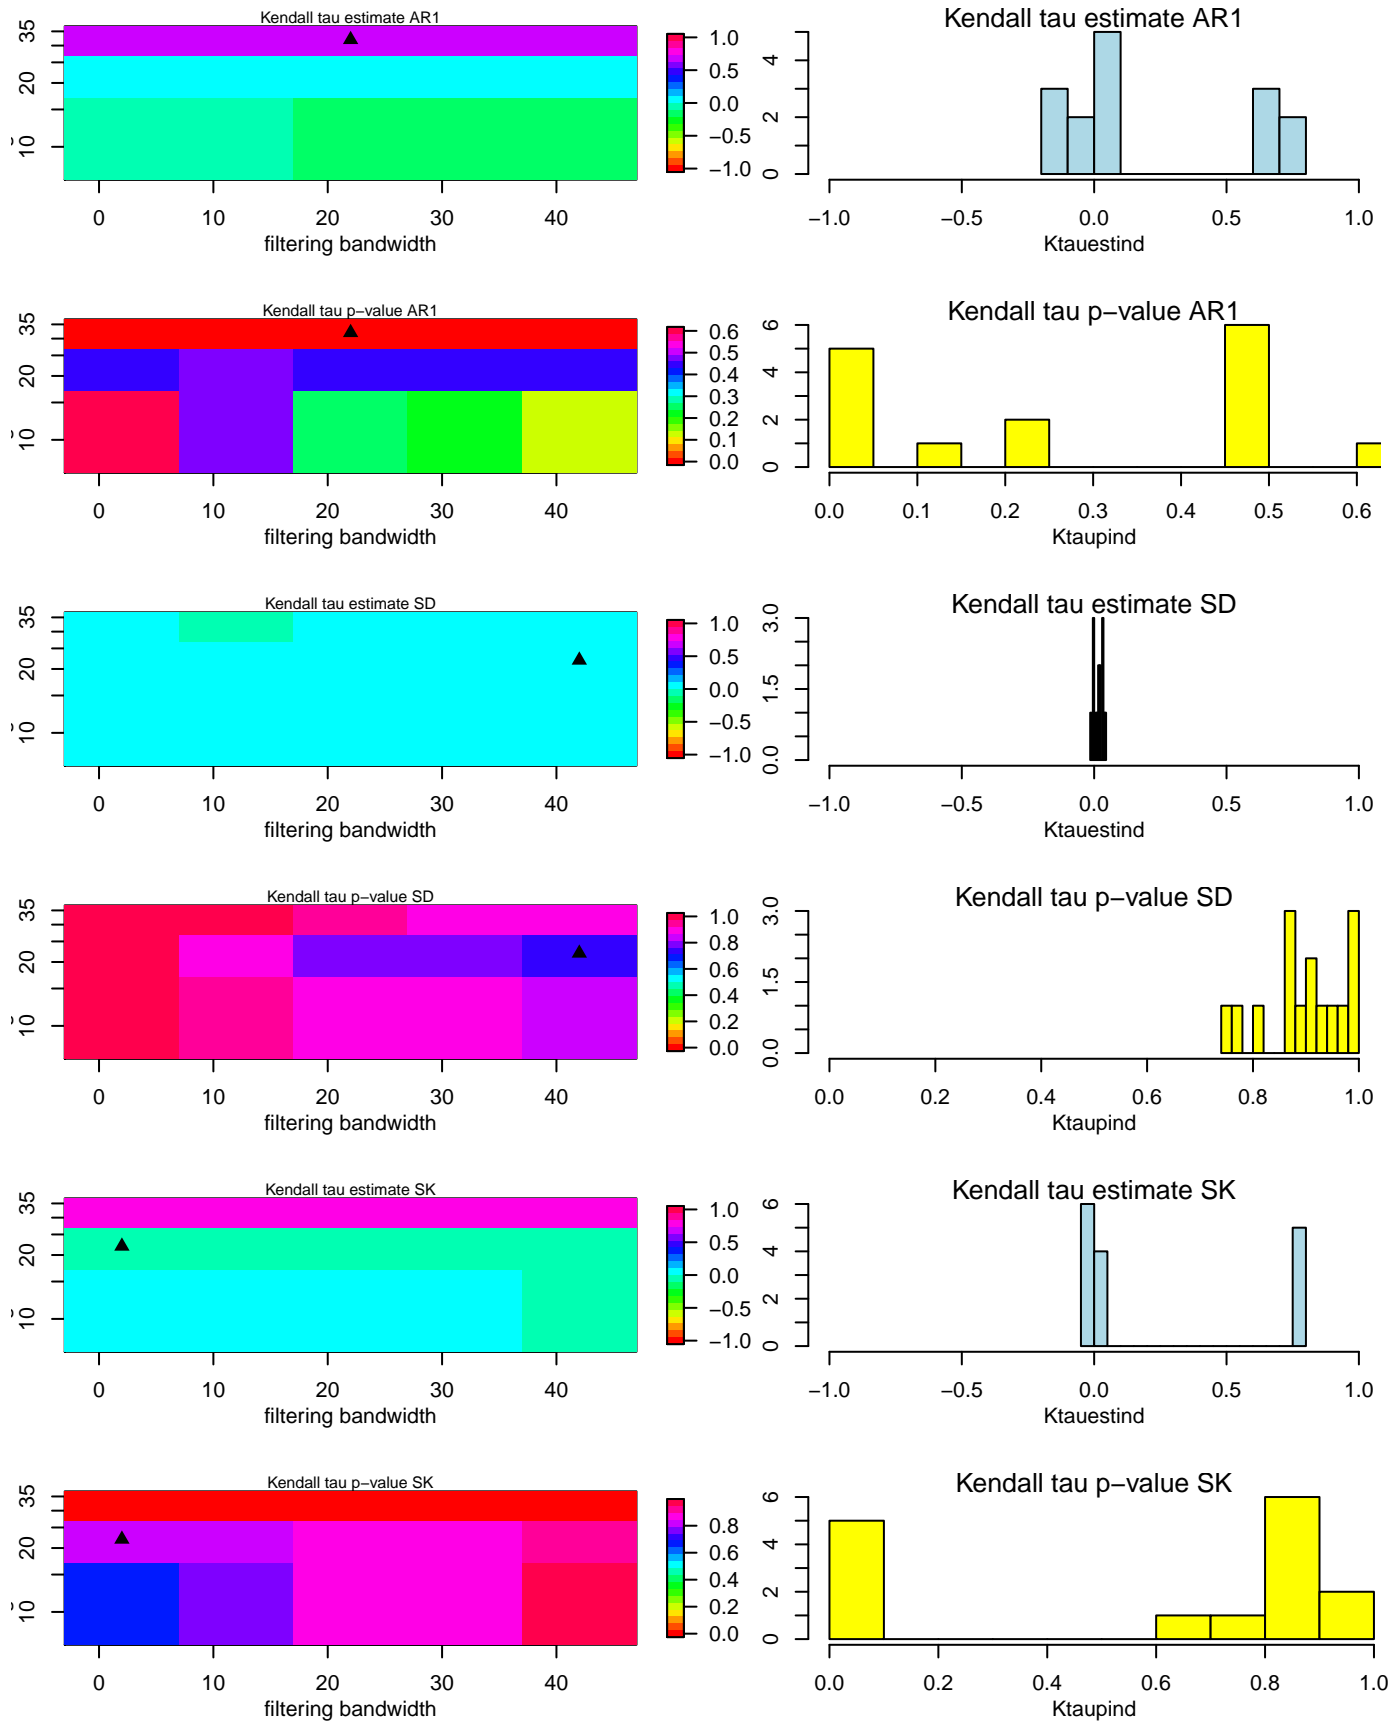

# Ireland

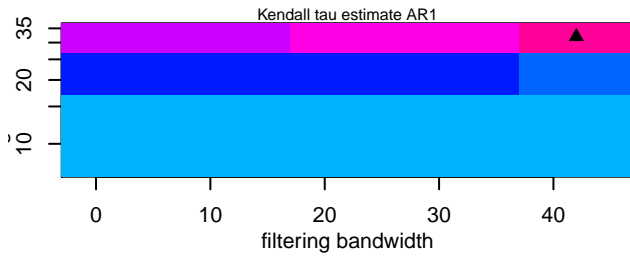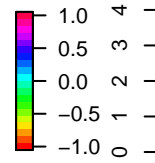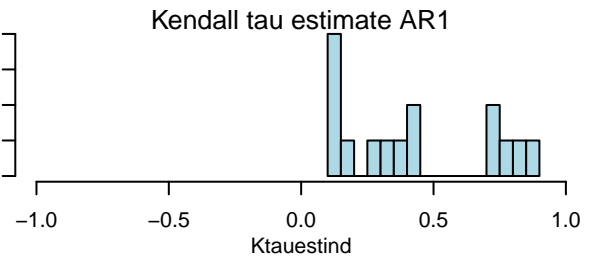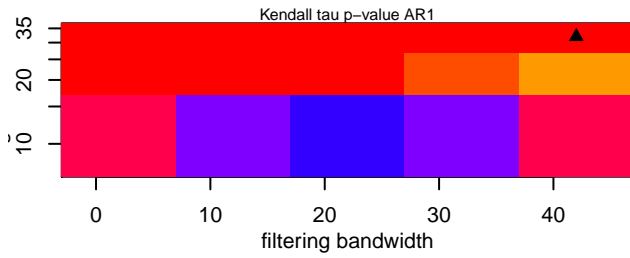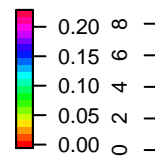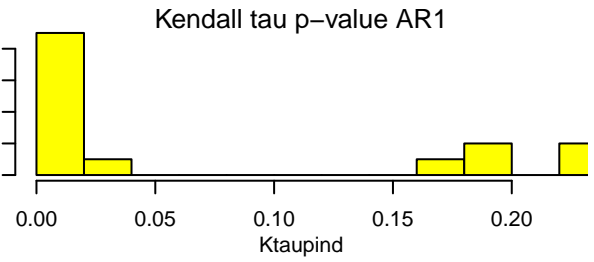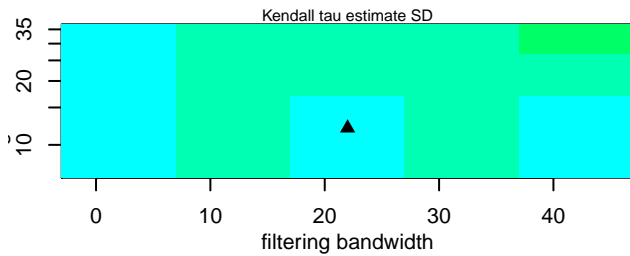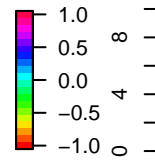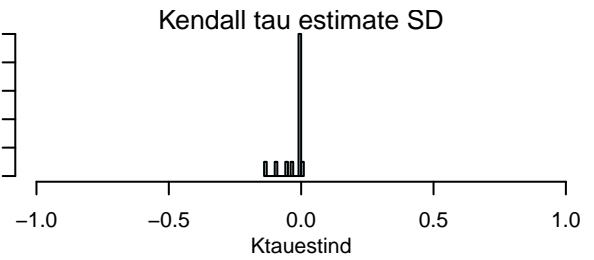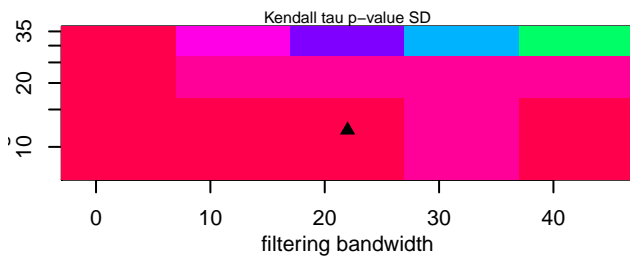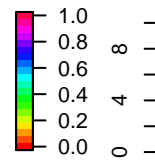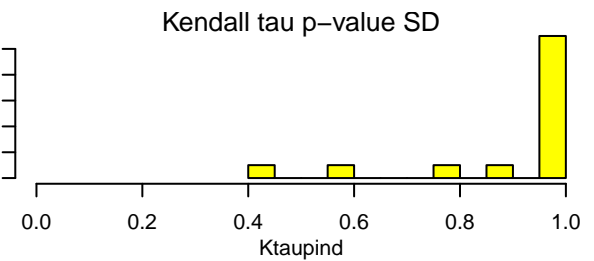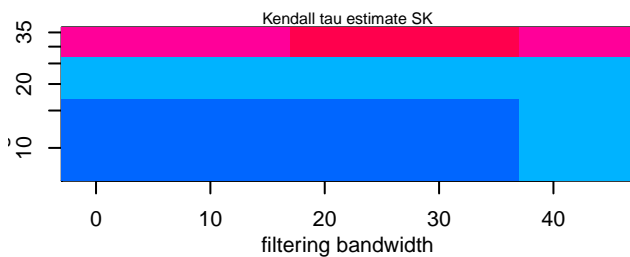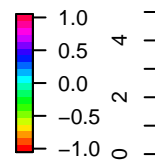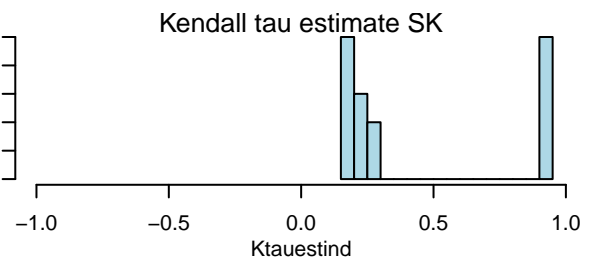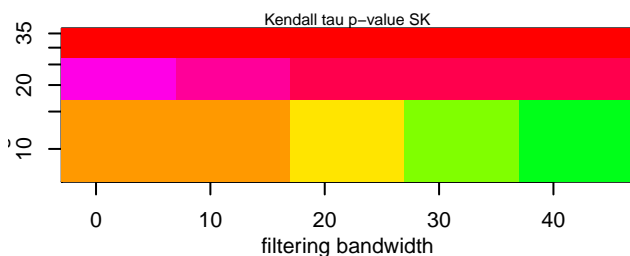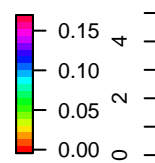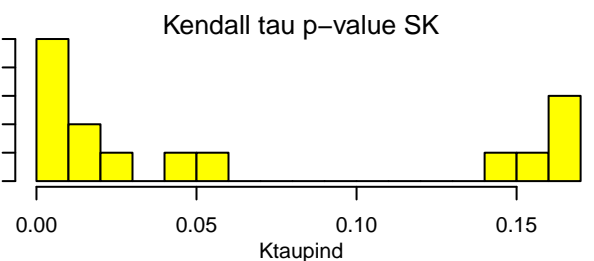

# Paris Basin

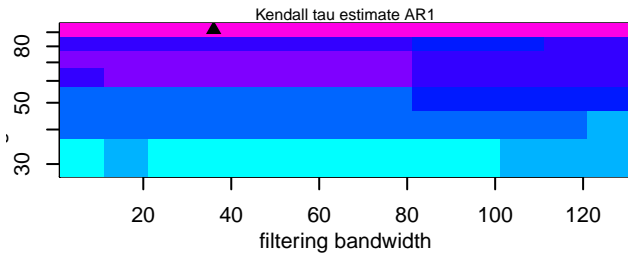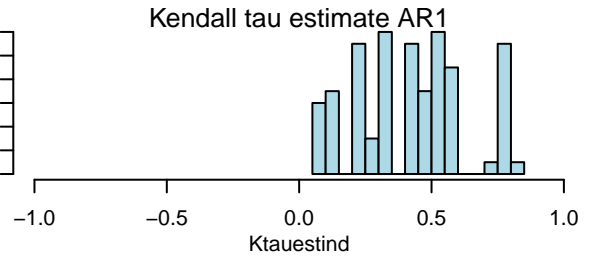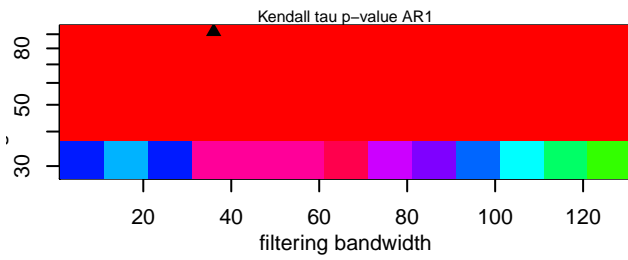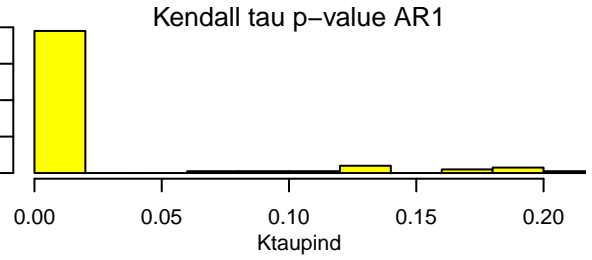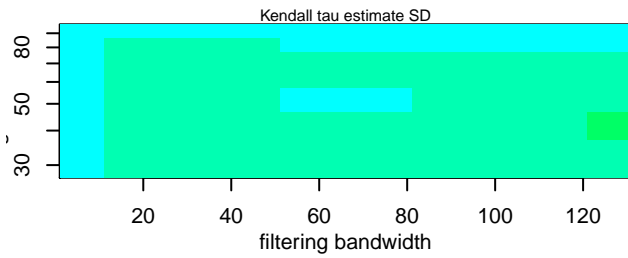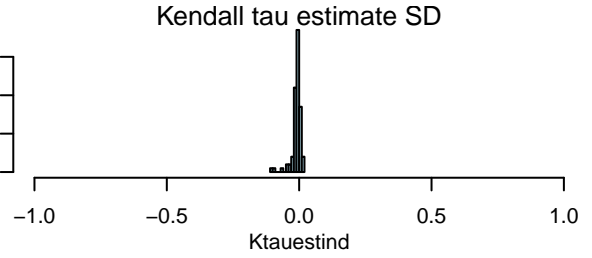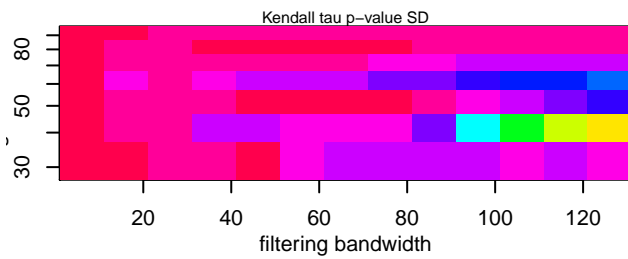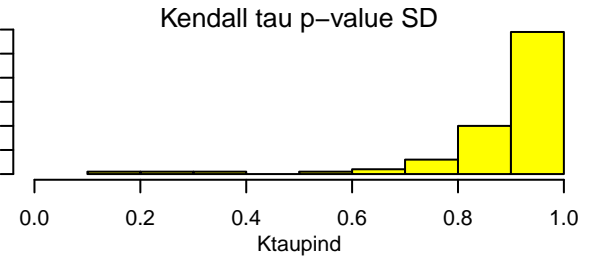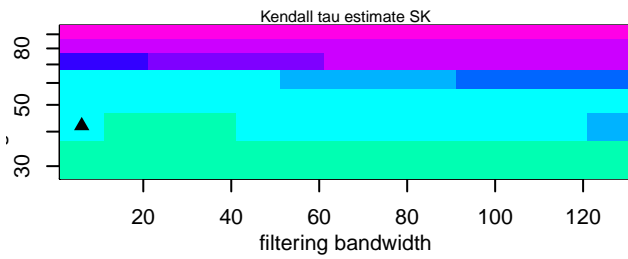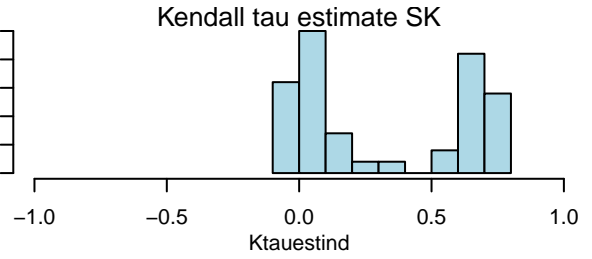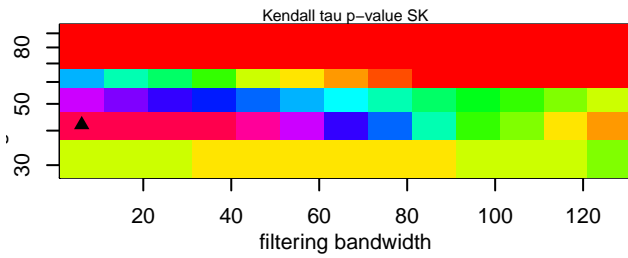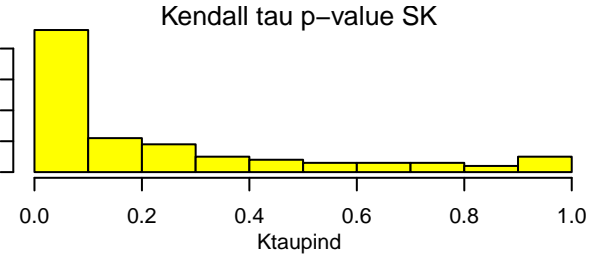

# Rhone-Languedoc

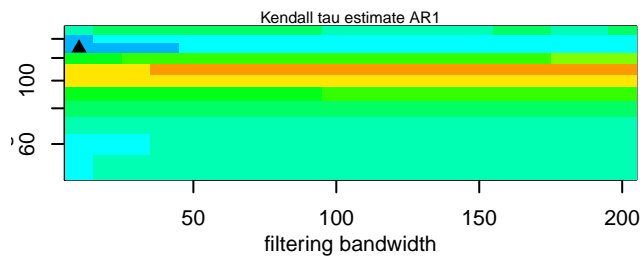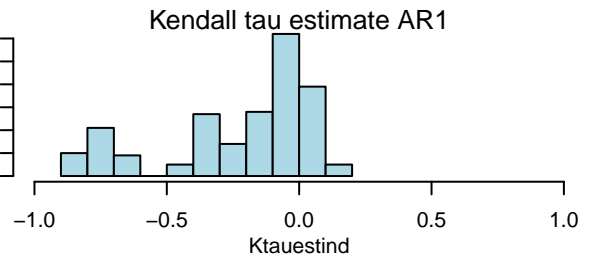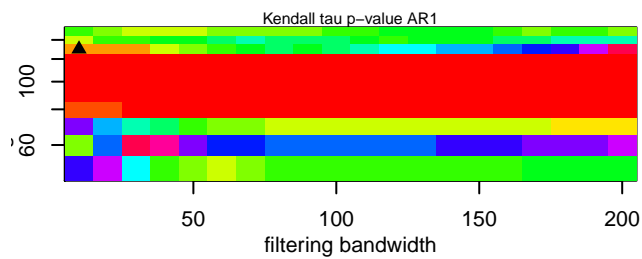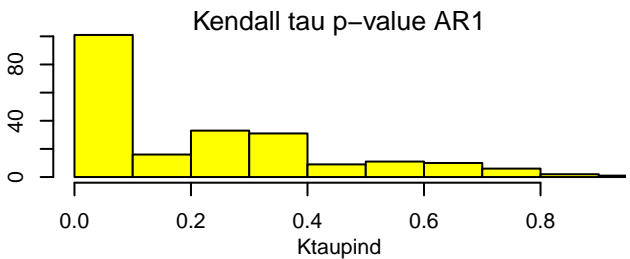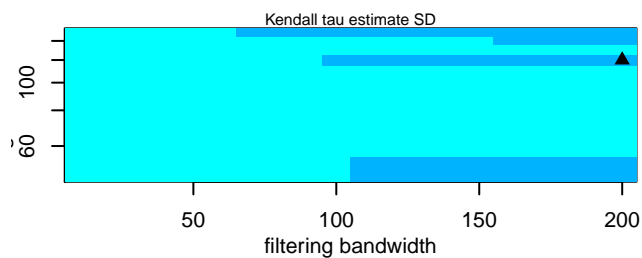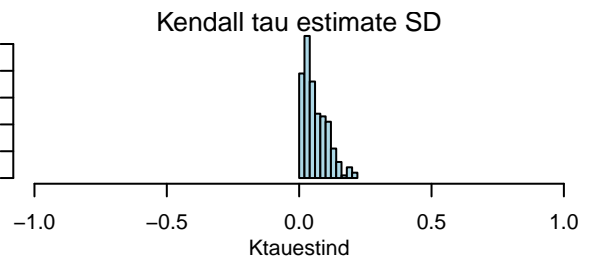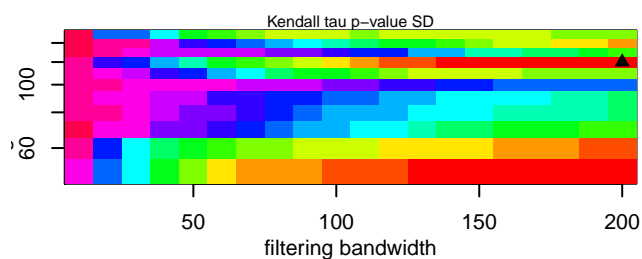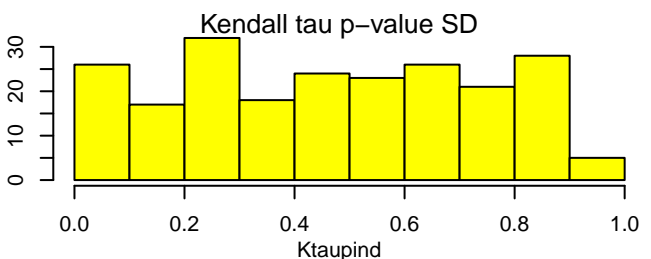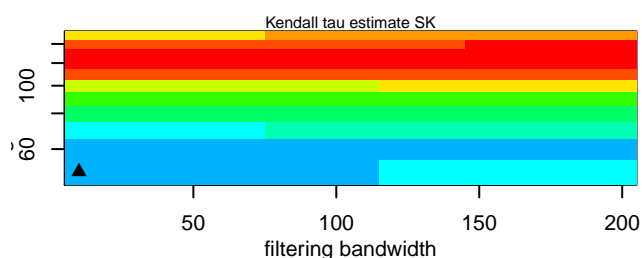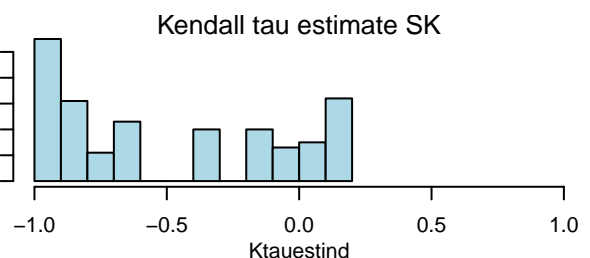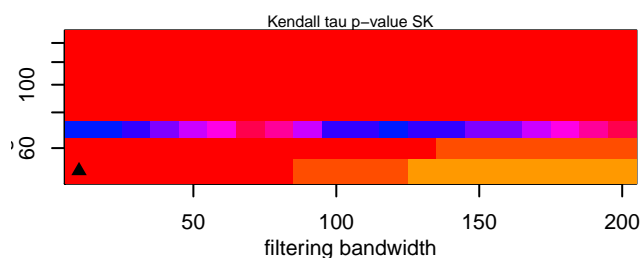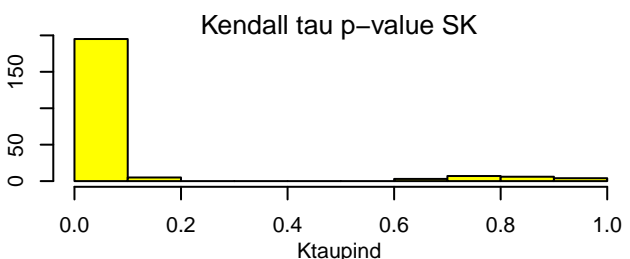

# Scotland

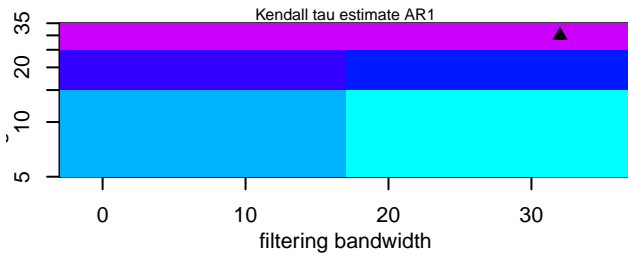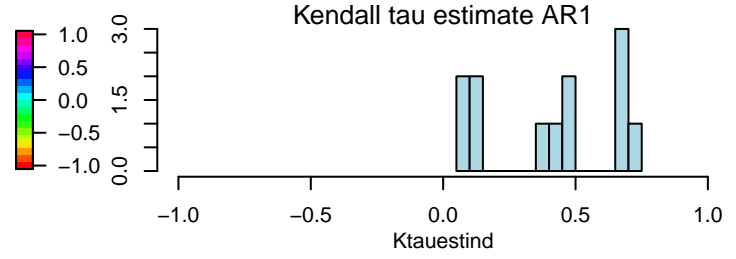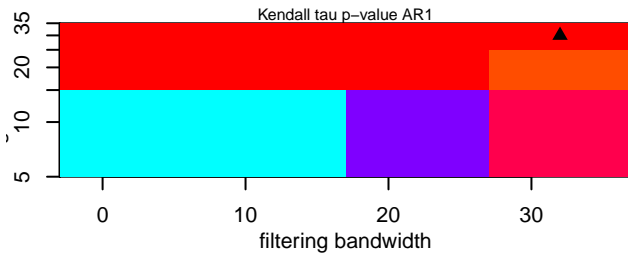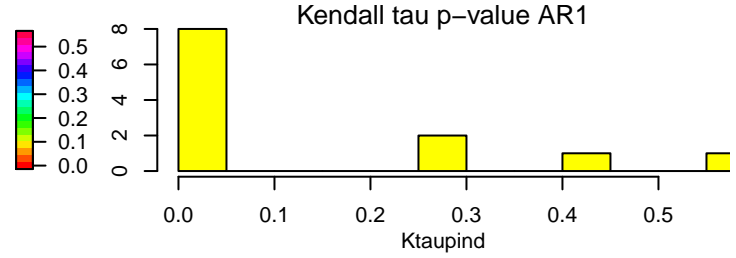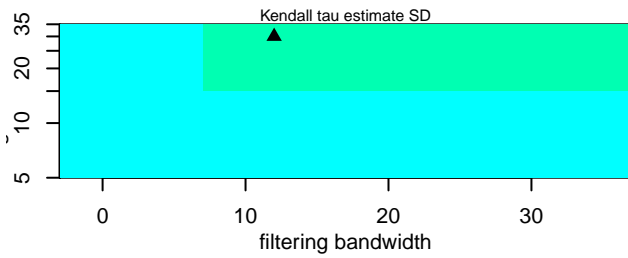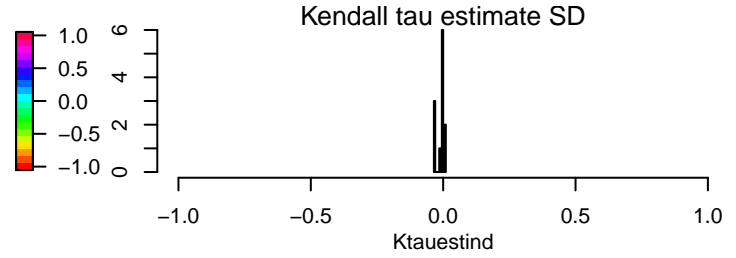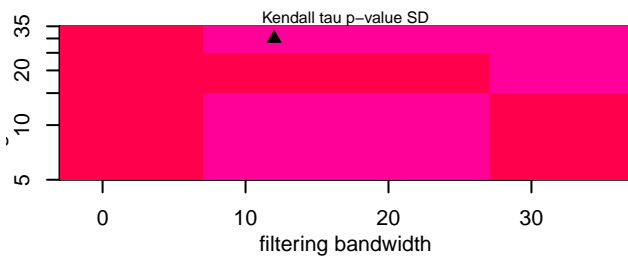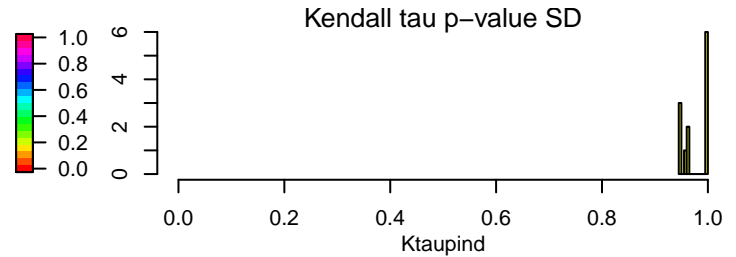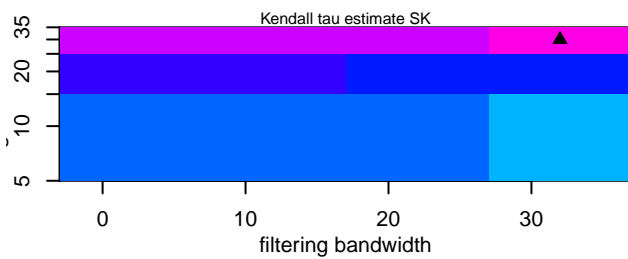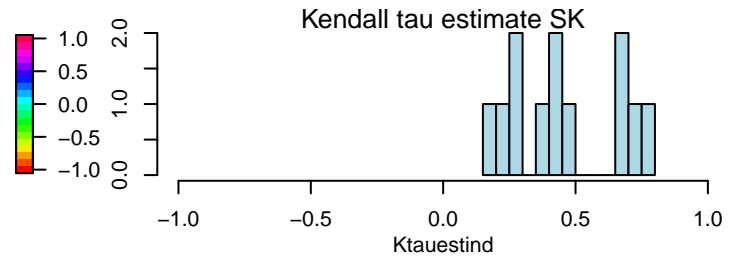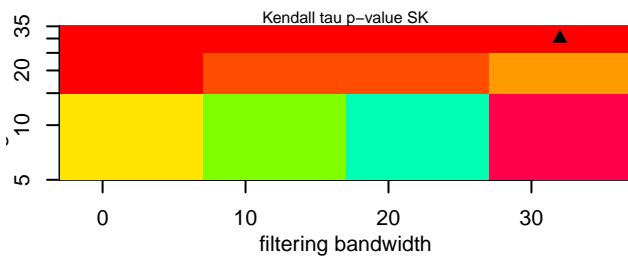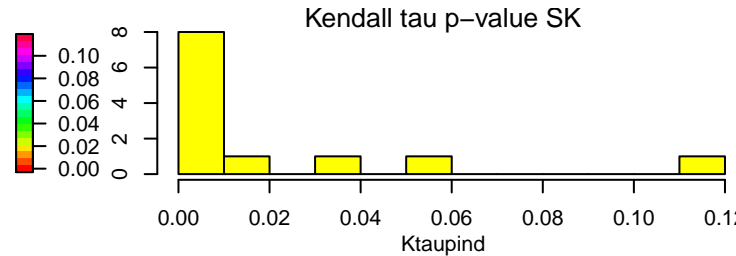

# Southern England (Wessex & Sussex)

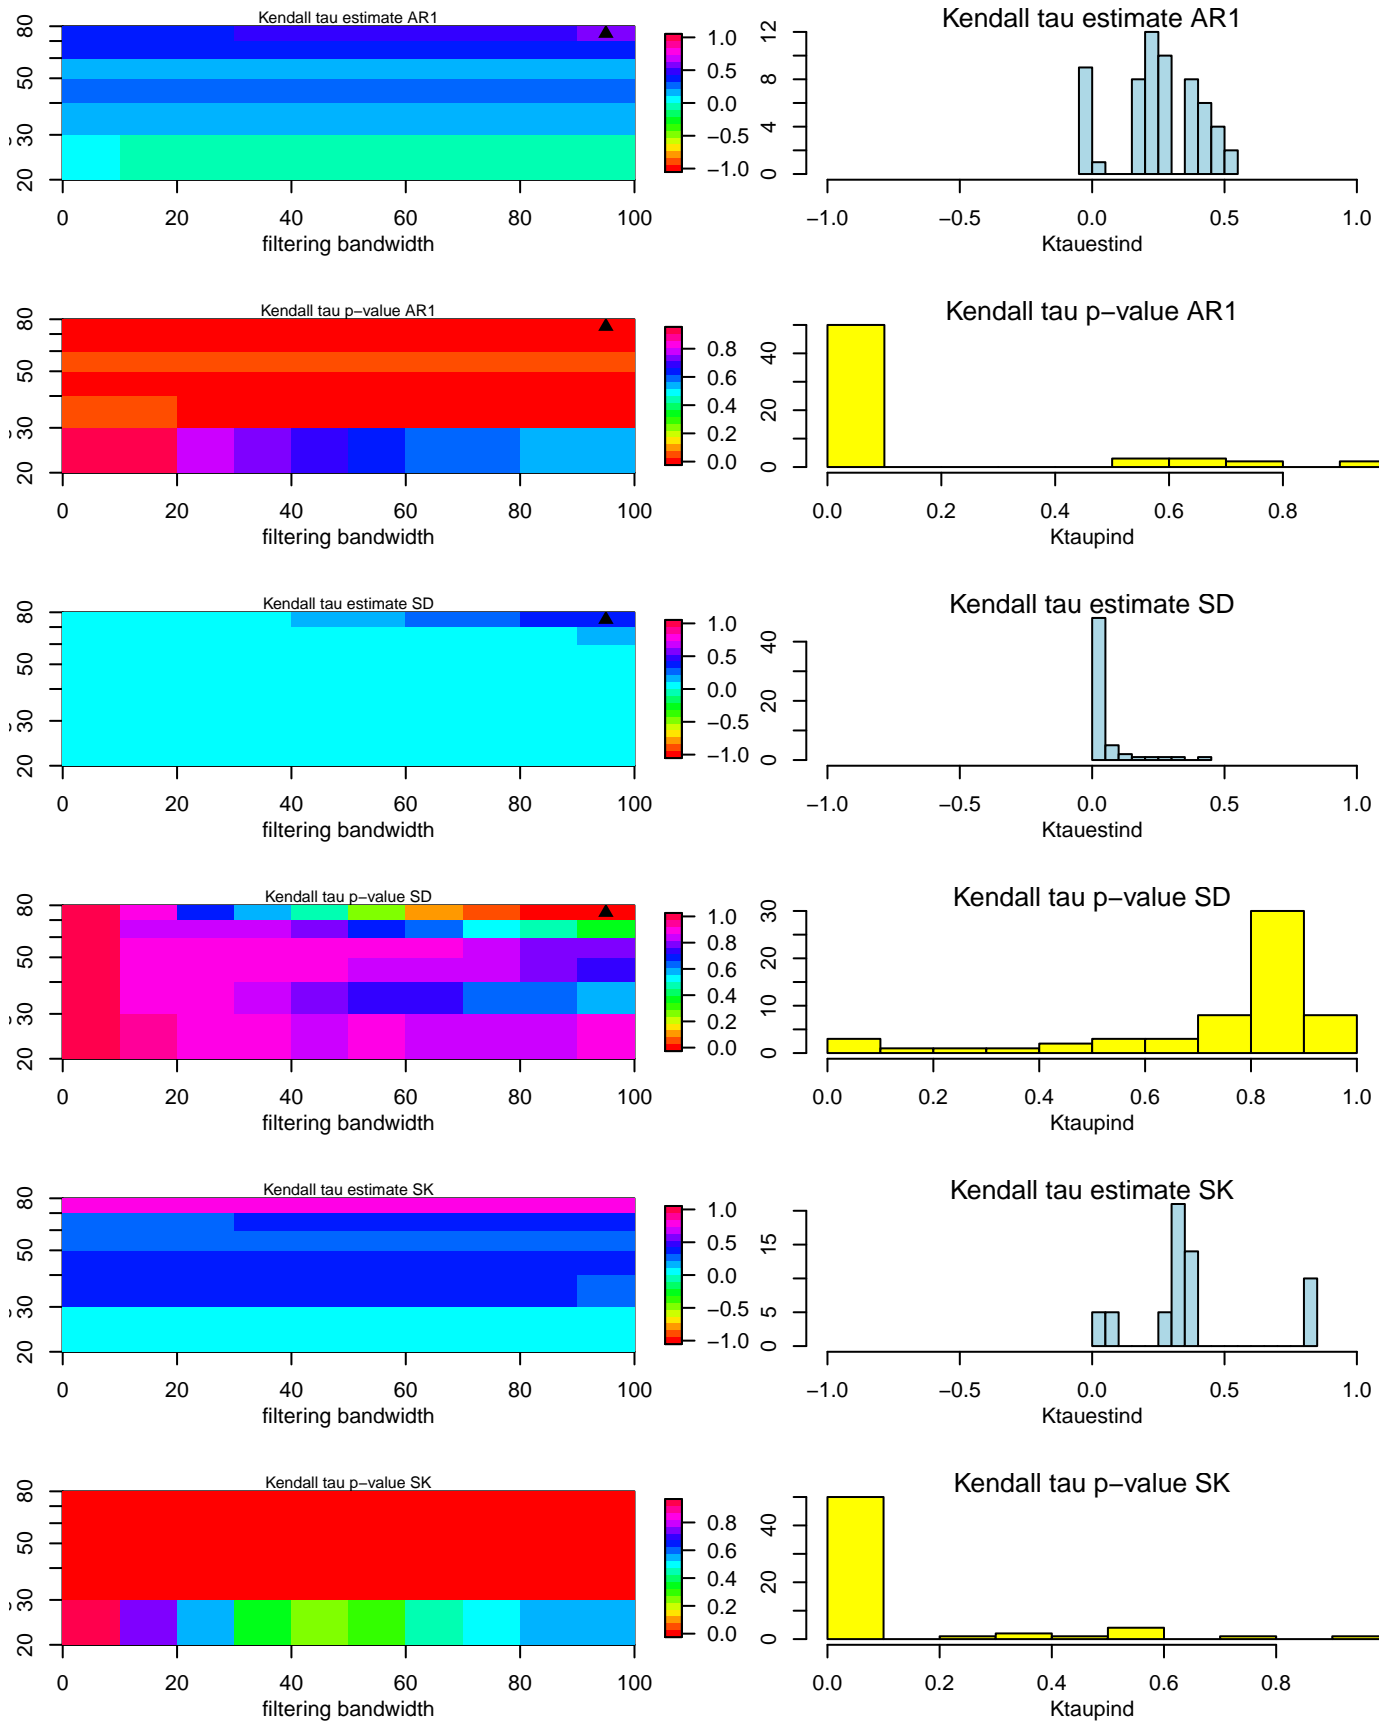

# Western France

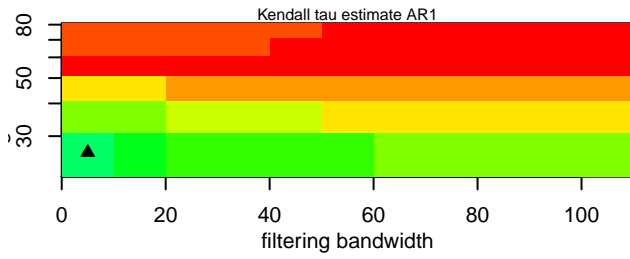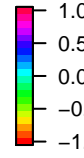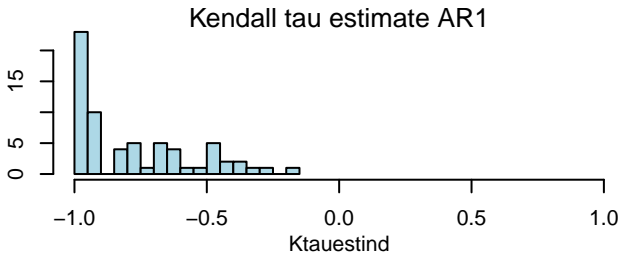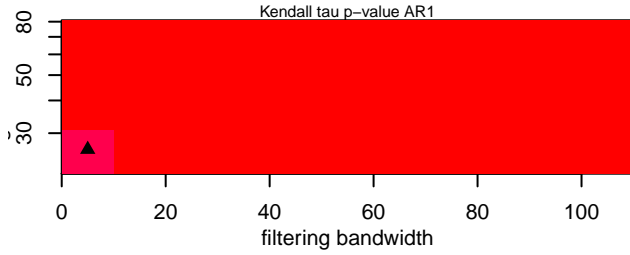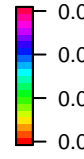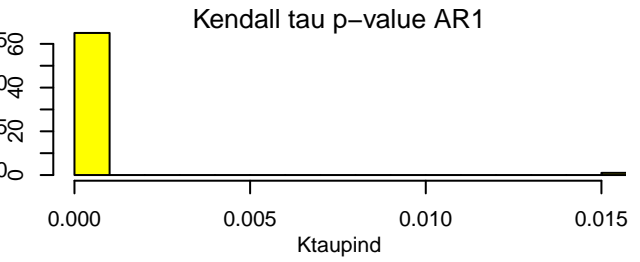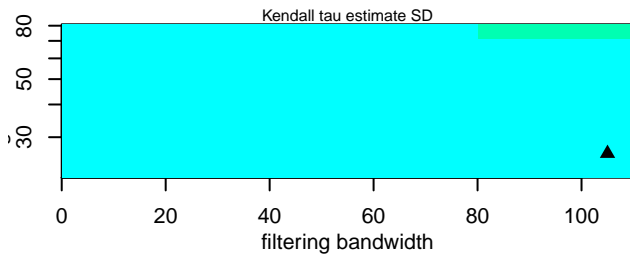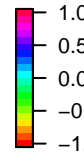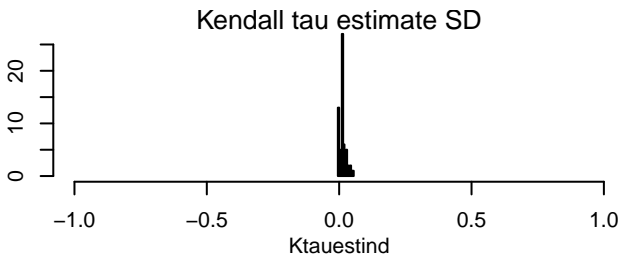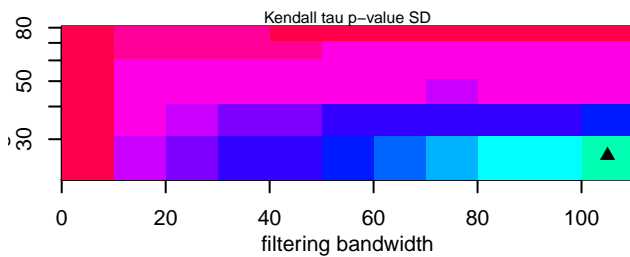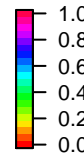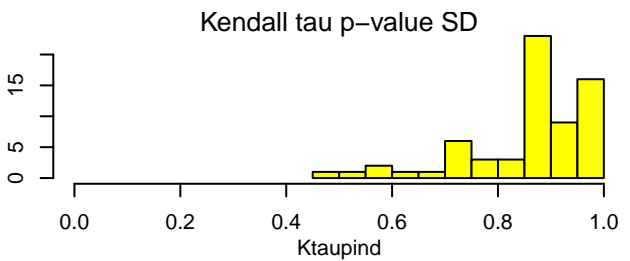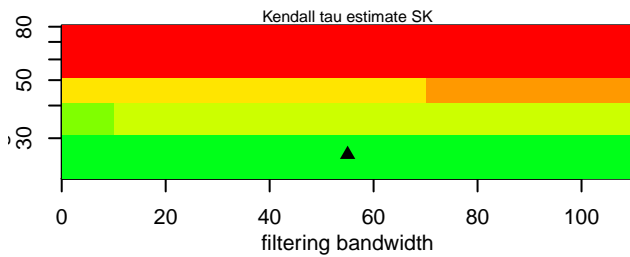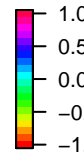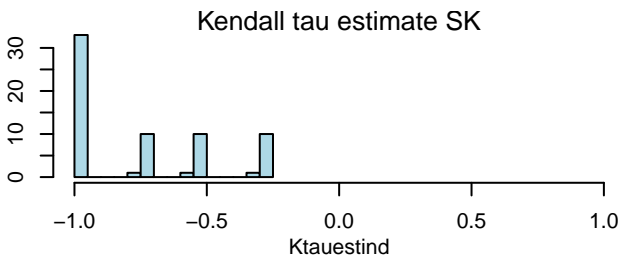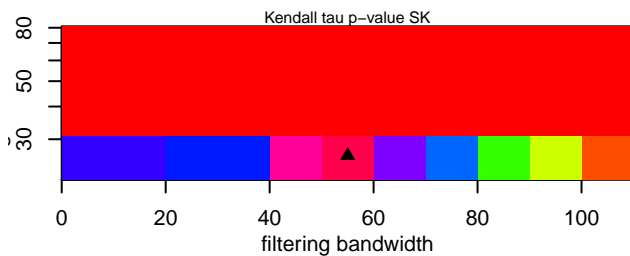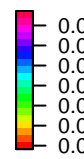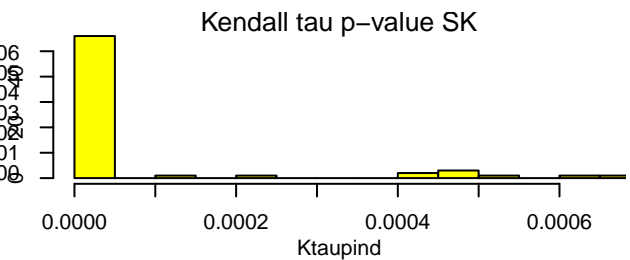

Supplement: pnas.1602504113.sd01.pdf [file pnas.1602504113.sd01.pdf]
